1 **Regulatory interplay between RNase III and asRNAs in *E. coli*; the case of AsflhD and the master**  
2 **regulator of motility, *flhDC***

3 Maxence Lejars,<sup>a,\*,#</sup> Joël Caillet,<sup>a</sup> Maude Guillier,<sup>a</sup> Jacqueline Plumbridge,<sup>a</sup> Eliane Hajnsdorf,<sup>a,#</sup>

4  
5 <sup>a</sup>UMR8261, CNRS, Université de Paris, Institut de Biologie Physico-Chimique, 13 rue Pierre et Marie  
6 Curie, 75005 Paris, France

7  
8 *Running Head: Antisense RNA control of flhD expression*

9  
10 #Address correspondence to Eliane.Hajnsdorf@ibpc.fr, maxence.lejars@md.tsukuba.ac.jp

11 \*Present address; Division of Biomedical Science, Faculty of Medicine, University of Tsukuba,  
12 Tsukuba, Ibaraki, Japan.

13  
14 abstract; 175 words

15 text; 7083 words

16

## 17 **Abstract**

18 In order to respond to ever-changing environmental cues, bacteria have evolved resilient regulatory  
19 mechanisms controlling gene expression. At the post-transcriptional level, this is achieved by a  
20 combination of RNA-binding proteins, such as ribonucleases (RNases) and RNA chaperones, and  
21 regulatory RNAs including antisense RNAs (asRNAs). AsRNAs bound to their complementary mRNA  
22 are primary targets for the double-strand-specific endoribonuclease, RNase III. By comparing  
23 primary and processed transcripts in an *rnc* strain, mutated for RNase III, and its isogenic wild type  
24 strain, we detected several asRNAs. We confirmed the existence of RNase III-sensitive asRNA for  
25 *crp*, *ompR*, *phoP* and *flhD* genes, encoding master regulators of gene expression. AsflhD, the asRNA  
26 to the master regulator of motility *flhDC*, is slightly induced under heat-shock conditions in a  
27 sigma24 (RpoE)-dependent manner. We demonstrate that expression of AsflhD asRNA is involved in  
28 the transcriptional attenuation of *flhD* and thus participates in the control of the whole motility  
29 cascade. This study demonstrates that AsflhD and RNase III are additional players in the complex  
30 regulation ensuring a tight control of flagella synthesis and motility.

## 32 **Importance**

33 The importance of asRNAs in the regulation of gene expression has long been underestimated.  
34 Here, we confirm that asRNAs can be part of layered regulatory networks since some are found  
35 opposite to genes encoding global regulators. In particular, we show how an antisense RNA (AsflhD)  
36 to the gene expressing a transcription factor serving as the primary regulator of bacterial swimming  
37 motility (FlhD<sub>4</sub>C<sub>2</sub>) is involved in the transcriptional attenuation of *flhD*, which in turn impacts the  
38 expression of other genes of the motility cascade. The role of AsflhD highlights the importance of  
39 discrete fine-tuning mechanisms in the control of complex regulatory networks.

40 **Keywords**

41 asRNAs, RNase III, transcriptional attenuation, *flhD*, motility, *phoP*, *E. coli*

42 **Abbreviations**

43 Antisense RNA (asRNA); RNA-binding protein (RBP); untranslated region (UTR); small RNA (sRNA):  
44 open reading frame (ORF); nucleotide (nt); circular RT-PCR (cRT-PCR); RNA polymerase (RNAP)

## 45 Introduction

46 In eukaryotes, hundreds of RNA-binding proteins (RBPs) and multiple classes of regulatory RNAs are  
47 involved in the complex regulation of gene expression (splicing, editing...). In bacteria, the relative  
48 scarcity of RBPs and regulatory RNAs, led to the supposition that they provided only accessory  
49 contributions to the major bacterial gene regulatory mechanisms. An important obstacle in  
50 deciphering regulatory networks is their multi-component nature and the existence of “missing  
51 links” between regulators and their targets. These intermediates can have both positive and  
52 negative impacts on gene expression, leading to compensatory effects upon removal of one of them  
53 (1-6). Hence, the fine-tuning of gene expression is far from fully understood in many if not most  
54 cases.

55 Many bacterial small RNAs (sRNAs) are regulators that base-pair with RNA, with their genes located  
56 in *trans* to their targets and acting by short, imperfect regions of base-pairing. This property allows  
57 them to act on multiple targets. In contrast, the genes for antisense RNAs (asRNAs) are located in *cis*  
58 to their complementary target and thus have, in most cases, a single dedicated target. Fewer  
59 asRNAs have been described as compared to sRNAs probably because of their high lability, their low  
60 conservation among species and because they were usually considered the products of pervasive  
61 transcription arising from leaky terminators (7-10).

62 Initially, asRNAs were identified on mobile genetic elements (prophages and plasmids), with their  
63 only purpose to control their replication and partition. The importance of asRNAs was later  
64 demonstrated to extend to almost all kinds of biological processes (11), as in the case of type I  
65 toxin-antitoxin systems, involved in persistence, in which the toxin mRNA is neutralized by an asRNA  
66 that induces degradation and/or translation inhibition (12). Furthermore, the double-strand-specific  
67 RNase III has been known to be an important player in asRNA regulation, as in the case of the  
68 regulation of plasmid copy number and toxin-antitoxin systems (13-14).

69 The mechanisms of action of asRNAs are diverse. They can negatively regulate transcription by  
70 interference due to the collision of two converging RNA polymerases or by attenuation due, in some  
71 cases, to the stabilization of a terminator structure in the mRNA upon binding of the asRNA (15, 16).  
72 However, despite complete complementarity, the interaction of asRNA and its target requires, in  
73 some cases, formation of an intermediate called "kissing complex" (13, 17). These interactions can  
74 have negative or positive consequences on gene expression since they induce modifications to the  
75 RNA secondary structure and/or physically interfere with the activity of other regulators (18, 19).  
76 Very often, the mechanism by which a specific asRNA regulates its target remains unclear due to the  
77 impossibility to modify the sequence of the asRNA independently of its target.

78 Various approaches have been used to enrich the *E. coli* transcriptome for double-stranded RNAs,  
79 which are the presumed intermediates in asRNA regulation. Studies using inhibition of Rho-  
80 dependent transcription termination demonstrated that pervasive antisense transcription is  
81 common in almost all loci in *E. coli* (20). In 2010, one thousand asRNAs were identified suggesting  
82 their importance in the control of gene expression (9). Another study focusing on the mapping of  
83 transcriptional units highlighted the presence of 498 asRNAs mostly from overlapping untranslated  
84 regions (UTRs) within convergent or divergent operons (21). Immunoprecipitation of double-  
85 stranded RNAs using specific antibodies allowed the identification of 200 asRNAs of which 21 were  
86 validated as RNase III-degraded asRNAs (22). In a fourth study, primary transcripts were isolated by  
87 selective tagging allowing the identification of 212 asRNA transcription start sites (asTSSs) (23).  
88 More recently, p19 viral protein capture of double-stranded RNAs identified 436 asRNAs (24).  
89 Unexpectedly, there is a little overlap between the identified asRNAs from these different studies,  
90 which may be due to technical bias, but may also depend on the genetic context and/or the  
91 environmental conditions.

92 While previously published works focused on the identification of asRNAs, we aimed to characterize  
93 physiologically relevant asRNAs. Some time ago we performed a transcriptome analysis of an *rnc*  
94 mutant compared to its isogenic wt strain. We used a tailored RNA-seq approach described  
95 previously (25). In agreement with other published genomics experiments (22-23, 26) several  
96 candidate asRNA were detected, which were stabilized in the strain lacking RNase III activity. We  
97 were surprised to see that many were asRNA to genes of important regulators which raised the  
98 question of whether or not they could have a physiological impact on the expression and function of  
99 their target regulator and hence on the downstream regulon. We first confirmed that RNase III  
100 modulates the level of 4 of these antisense transcripts and then concentrated on the asRNA to *flhD*.  
101 *flhD* is the first gene of the *flhDC* operon encoding the master regulator of swimming motility. We  
102 find that AsflhD is involved in the direct repression of the transcription elongation of *flhD*, which  
103 provides an additional regulatory layer to the complex cascade of motility in enterobacteria.

## 105 **Results**

### 106 *Characterization of asRNAs stabilized upon RNase III inactivation*

107 An RNA-seq analysis in a wt and its *rnc105* derivative strain was performed by tagging transcripts  
108 according to their 5'-phosphorylation status, allowing to distinguish between 5'-triphosphate  
109 fragments (primary transcripts TSS), monophosphate 5'-fragments (processed transcripts, PSS) and  
110 internal fragments resulting from the fragmentation (INT) (25). The depth of sequence coverage  
111 was not sufficient for a compilation of all asRNAs. Instead we looked manually for antisense reads  
112 covering the translation signals of mRNAs that were enriched upon RNase III inactivation. Potential  
113 asRNA promoter regions were deduced by examination of the TSS and PSS fractions in the *rnc*  
114 strain. The RNase III processing sites in the wild-type were usually not obvious since they  
115 presumably provoked the rapid degradation of the asRNA. We selected 4 asRNAs to the *crp*, *ompR*,

116 *phoP* and *flhD* transcripts encoding important global regulators for verification by northern blot (Fig.  
117 1). We note that they had all been proposed as antisense transcripts in one or more of the previous  
118 genomic studies (9, 21-24).

119 The *crp* gene encodes the major regulator of carbon catabolite repression and it was shown  
120 previously to be transcriptionally regulated by a transcript initiated from a divergently expressed  
121 promoter 3 base-pairs upstream and on the opposite strand (27-28). This transcript, now known to  
122 express the *yhfA* gene, was detected in the wt strain (Fig. 1-A). Additional asRNAs, were stabilized in  
123 the *rnc* strain in the 3 fractions. The TSS of one species is located 20 nts upstream of the *crp*  
124 translation start on the opposite strand (shown by an orange dotted arrow on Fig. 1A) and in  
125 addition there is extensive asRNA, complementary to the *crp* coding sequence and 5'-UTR (INT). We  
126 performed northern blots using complementary probes hybridizing to positions 13 to 441 of the *crp*  
127 ORF to detect both the *crp* mRNA and its antisense transcript. An asRNA, named *Ascrp*, of about 350  
128 nts accumulates only in the mutant (Fig. 1-A).

129 The *ompR* gene encodes the response regulator of a two-component system involved in cell wall  
130 homeostasis and response to low pH, EnvZ-OmpR (29-32). We observed an asTSS 147 nts  
131 downstream from the AUG (Fig. 1-B) in wt and enhanced in the *rnc* mutant. Northern blotting with  
132 complementary probes corresponding to the 5'-end of the *ompR* ORF confirmed the presence of the  
133 *ompR-envZ* transcript and a long asRNA transcript, *AsompR*, of about 2000 nts, which is likely to also  
134 encode the divergently expressed *greB* gene. In addition, in the mutant, smaller fragments (less  
135 than 500 nts) are detected for both *ompR* and *AsompR* (Fig. 1-B), likely corresponding to a stable  
136 duplex between the sense and asRNA transcripts in the absence of RNase III.

137 The *phoP* gene encodes the response regulator of the PhoQ-PhoP two-component system, involved  
138 in cell wall homeostasis and in response to low magnesium (33-34). We observed an asRNA upon  
139 RNase III inactivation in the INT fraction about 282 nts downstream from the *phoP* AUG. Northern

140 blot with complementary probes corresponding to the 5'-end of the *phoP* ORF confirmed the  
141 accumulation of two fragments (AsphoP) about 300-320 nts long in the mutant (Fig. 1-C).

142 The *flhDC* genes are co-transcribed and together they encode the master regulator of motility,  
143 FlhD<sub>4</sub>C<sub>2</sub> (35). We detected an asRNA to *flhD* mRNA (AsflhD) accumulating in the mutant, initiated  
144 22 nts downstream from the *flhD* AUG. Northern blot analysis with probes hybridizing to the 5'-UTR  
145 of *flhD* confirmed the accumulation of AsflhD, with a major fragment about 220 nts and one minor  
146 fragment about 160 nts upon RNase III inactivation. Together, there was an increase in the amount  
147 of the full-length *flhD* mRNA in the mutant and the stabilization of a *flhD* fragment of approximate  
148 size 220 nts (Fig. 1-D).

149 All these asRNAs are partially or completely processed by RNase III since they are only visible in the  
150 *rnc* strain. Crp, OmpR, PhoP and FlhD are major regulators of gene expression in *E. coli*, all involved  
151 in the control of large regulons (RegulonDB v 10.5 (36)). We wondered whether these asRNAs and  
152 RNase III have a functional regulatory role and thus affect cell physiology. We studied in more  
153 details asRNAs to *phoP* and *flhD*, two regulators tightly controlled at both the transcriptional and  
154 post-transcriptional levels.

### 156 *Regulation of phoP and AsphoP by RNase III*

157 The RNA-seq profiles suggested that AsphoP may be transcribed from an asTSS located 282 nts  
158 downstream from the translation start of *phoP* mRNA. An asRNA derived from this TSS was  
159 confirmed by northern blot, probing for the 5'-region of the *phoP* ORF (Fig 1-C). In addition, the *rnc*  
160 mutation slightly increases *phoP* stability and amount but induces very large increases in the  
161 stability and level of AsphoP (Fig. 2-AB). Candidate consensus -10 and -35 sequences are located just  
162 upstream of AsphoP TSS (Fig. 2-C). To validate this potential promoter, we constructed a P<sub>AsphoP</sub>-*lacZ*



163 transcriptional fusion containing 150 nts before and 15 nts after the putative TSS of AsphoP, with  
164 the wt sequence ( $P_{AsphoP}^{wt}$ ) and also with mutations decreasing the agreement with the consensus in  
165 the predicted -35 and -10 boxes ( $P_{AsphoP}^-$ ) (Fig. 2-D). The mutated AsphoP promoter ( $P_{AsphoP}^-$ ) strongly  
166 decreased the expression of  $P_{AsphoP}-lacZ$  (20-fold), confirming it as the endogenous AsphoP  
167 promoter (Fig. 2-E). The activity of the  $P_{AsphoP}^{wt}-lacZ$  fusion decreased 2-fold in the mutant implying  
168 that RNase III positively regulates AsphoP. In summary, RNase III positively controls the  
169 transcription of AsphoP and also participates to the degradation of both *phoP* and AsphoP  
170 transcripts.

171 Sequence comparison with other bacterial species showed that although the region of the AsphoP  
172 promoter is moderately well conserved, there are several A to G substitutions in the -10 box at  
173 positions -9 and -12, suggesting that this promoter may be inactive in these genomes (Fig. 2-C). This,  
174 in turn, implies that, if AsphoP has any function, it could be limited to *E. coli* K-12 and have been  
175 counter-selected in these other species or more likely, represents a novel, evolving trait.

### 176 *Physiological expression of AsflhD*

177 Figure 1 shows a corresponding increase in the amounts of *flhD* and the appearance of a smaller  
178 mRNA fragment in the *rnc* mutant. Intriguingly 40 years ago it was noted that RNase III was involved  
179 in the swimming activity of *E. coli* and *rnc* mutants were immotile (37). In this work we have  
180 investigated whether RNase III could exert this effect *via* AsflhD.  
181

182 The RNA-seq profiles revealed an asTSS 22 nts downstream from the translation start of *flhD* as  
183 reported by Dornenberg *et al.* (9). A candidate promoter exists upstream of this asTSS. Sequence  
184 alignment of this region in other enterobacteria shows a good conservation of a promoter with an  
185 extended -10 5'-TG box (38), suggesting that this promoter is conserved and active (Fig. 3-A).

186 To validate the presence of a functional promoter, a  $P_{AsflhD}$ -*lacZ* transcriptional fusion ( $P_{AsflhD}^{wt}$ ) was  
187 constructed containing 165 nts before and 15 nts after the putative TSS of *AsflhD* (Fig 3-B). This  
188 fusion showed a relatively low level of  $\beta$ -galactosidase activity (Fig. 3-C). Its expression was strongly  
189 increased when the -10 motif was improved towards the RpoD consensus ( $P_{AsflhD}^{+}$ ) while mutating  
190 the -35 to a less consensus sequence ( $P_{AsflhD}^{-}$ ) decreased expression 2-fold (Fig. 3-C) confirming that  
191 we had identified the *AsflhD* promoter. It should be noted that mutations were designed to be used  
192 in the endogenous *flhD* locus, and chosen to minimally affect the coding sequence of *flhD* and to  
193 avoid introduction of rare codons. The low level of expression made us wonder if *AsflhD* was  
194 expressed using an alternative sigma factor. A heat-shock increased  $P_{AsflhD}$ -*lacZ* expression 2-fold  
195 after 15 minutes and 5-fold after 60 minutes and also increased the level of the *AsflhD* RNA in the  
196 *rnc* strain (Fig. 3-DE). Comparison of the *asflhD* promoter with the consensus sequences for the two  
197 heat-shock sigma factors,  $\sigma^H$  and  $\sigma^E$  (*rpoH* and *rpoE*) shows better correlation with the  $\sigma^E$  consensus  
198 than with  $\sigma^H$  (Fig. 3-A) (39-40).

199 We then examined whether the  $P_{AsflhD}$  promoter is under the control of RpoE by using a strain  
200 deleted for *rseA* (anti- $\sigma$  factor inhibitor of RpoE), which leads to strong induction of the RpoE  
201 regulon (41-42). Deletion of *rseA* increased 2-fold the expression of the wt  $P_{AsflhD}$ -*lacZ* fusion and of  
202 the improved  $P_{AsflhD}^{+}$ -*lacZ* construct (Fig. 3-FG) comparable with the effect of the heat-shock at 46°C,  
203 known to induce the RpoE regulon (43). To test for an effect of *rpoH*, we introduced the  $P_{lac}$   
204 promoter in front of the endogenous *rpoH* gene and compared *AsflhD* RNA levels in wt and *rnc*  
205 mutant cells after 15 minutes of heat-shock at 45°C, in the presence or absence of IPTG. *rpoH* mRNA  
206 expressed from its own promoter or from the  $P_{lac}$  promoter in the presence of IPTG was strongly  
207 increased by the heat-shock (Fig. 3-E). *AsflhD* was only detected in the *rnc* mutant and there was a  
208 correlation between the levels of *rpoH* and *AsflhD* transcripts at 30°C and 45°C with and without  
209 IPTG (Fig. 3-E). However, *RpoH* overexpression at 37°C revealed a slight repression of the

transcription of AsflhD on the wt  $P_{AsflhD}$ -*lacZ* fusion (Fig. S1-A) even though RNase III-stabilized AsflhD accumulated when RpoH was induced at 45°C. This would seem to rule out a direct role for RpoH in AsflhD transcription. We also tested RpoS overexpression but found it had no effect on the transcription of AsflhD (Fig. S1-B). These experiments indicate that  $P_{AsflhD}$  is functional and induced during a heat-shock due primarily to the activity of RpoE, acting directly or indirectly on the promoter of AsflhD.

To confirm the identification of the AsflhD promoter and to allow variation of the AsflhD expression,  $P_{AsflhD}^-$  and  $P_{AsflhD}^+$  were introduced at the endogenous *flhDC* locus and the expression of the AsflhD asRNA was examined by northern blot. The inactivation of the native promoter prevented the detection of AsflhD in the *rnc* mutant bacteria. Conversely, the mutation overexpressing AsflhD, led to the detection of a faint smear in the wt strain and to the accumulation of a high level of AsflhD in the mutant (Fig. 3-H). In summary, we have identified the AsflhD promoter and shown that the mutations in the promoter of AsflhD can be used as tools to study the function of AsflhD at the genomic locus of *flhD*.

#### Characterization of the 3'-end of AsflhD

AsflhD RNA is only detected in the *rnc* strain, implying that it is very labile when RNase III is active (Fig. 3-E). Circular RT-PCR experiments (cRT-PCR) confirmed that AsflhD is indeed expressed in both the wt and *rnc* strains from the predicted asTSS promoter but that the 3'-extremities of the different AsflhD transcripts are highly heterogeneous and can extend up to 345 nts in the mutant (Fig. 4-A). Surprisingly, no 220 nts long RNA (Figs. 1-C, 3-EH) was detected in the mutant by cRT-PCR while a 149 nts long fragment was found several times exclusively in the wt strain, which might suggest that it is an intermediate in the degradation of AsflhD. It should be noted that the requirement for a ligation step during the cRT-PCR may lead to a bias towards more accessible

234 single-stranded RNA fragments and could have excluded double-stranded RNAs from this analysis.  
235 The stable AsflhD 220 nts transcript detected in *rnc* (Fig. 5-A) should correspond to duplex RNA  
236 formation between transcripts of the convergent *flhD* and AsflhD promoters. The equivalent sense-  
237 transcript is also detected (Figs. 1-D, 5-B below). RNase III is clearly a major factor in the  
238 degradation of AsflhD. We also investigated the role of RNase E, the major endonuclease involved in  
239 mRNA turnover in *E. coli*, and of PNPase an exoribonuclease negatively controlled by RNase III. We  
240 found that the low stability of AsflhD is independent of the activity of PNPase but depends on  
241 RNase E, since a longer transcript of an approximate size of 300 nts is detected upon RNase E  
242 inactivation (Fig. 4-B). Hence, RNase III and RNase E are both involved in the rapid turnover of  
243 AsflhD but they act independently.

#### 244 245 *Independent degradation of flhD and AsflhD transcripts by RNase III*

246 We further investigated the role of RNase III in the degradation of *flhD* mRNA and AsflhD asRNA.  
247 First, we analyzed the stability of both AsflhD and *flhD* transcripts upon RNase III inactivation. In the  
248 mutant the 220 nts long AsflhD transcript and also a somewhat shorter about 160 nts long  
249 transcript were strongly stabilized, while both the amount and the stability of the long *flhDC* mRNA  
250 increased only 2-fold (Fig. 5-AB). In addition, a 220 nts long *flhD* RNA fragment was highly stabilized  
251 in the *rnc* strain. It is derived from the 5'-UTR, where the probe used in this study to detect *flhD*  
252 mRNA is located (Table S2). It presumably corresponds to a fragment of the *flhD* mRNA extending  
253 from its promoter to the AsflhD promoter located in the beginning of the *flhD* ORF (Fig. 3-A) and  
254 thus is complementary to AsflhD. The interaction of the 5'-UTR of *flhD* mRNA with AsflhD should  
255 generate an RNA duplex (Fig. 4-A) whose degradation depends on cleavage by RNase III.

256 We examined the interaction between AsflhD and *flhD* RNAs and their cleavage by RNase III *in vitro*.  
257 A 308 nts long *flhD* transcript corresponding to the 5'-UTR and part of the ORF of the *flhD* mRNA

258 and a 256 nts long AsflhD asRNA were synthesized and labeled at their 5'-extremity. These two  
259 RNAs form a duplex when present in equimolar concentrations, which is completely degraded upon  
260 addition of RNase III (Fig. S2-AB). Remarkably, under the same condition, RNase III cleaves the  
261 individual RNAs independently at 2 sites on AsflhD and 4 sites on *flhD* (Fig. S2-CD). These cleavage  
262 sites are located within regions able to form secondary structure on each molecule (6, 44) (Fig. S2-  
263 C). RNase III is thus able to process both AsflhD and *flhD* RNAs *in vitro*, at specific sites but is also  
264 able to drive the complete degradation of the 5'-UTR of *flhD* when it is bound to the asRNA AsflhD.  
265 As AsflhD is never detected in the wt strain, this implies that it immediately base-pairs with *flhD* and  
266 both are degraded, so changes in AsflhD expression will directly modulate the level of *flhD* mRNA.

### 267 268 *AsflhD represses the expression of flhD*

269 To investigate the function of AsflhD we determined the effect of AsflhD silencing and  
270 overexpression on *flhD* expression by following *flhD* mRNA abundance and stability using the  
271 endogenous  $P_{AsflhD}$  mutations described above. While a slight decrease (35%) of *flhD* mRNA  
272 abundance results from both silencing ( $P_{AsflhD}^-$ ) and overexpression ( $P_{AsflhD}^+$ ) of AsflhD, the stability of  
273 *flhD* mRNA was not significantly affected in either  $P_{AsflhD}$  mutants (Table 1).

274 Two translational *lacZ* reporter fusions encompassing the 5'-UTR and the first 34 amino-acids of  
275 FlhD (including  $P_{AsflhD}$ ) were introduced at the *lacZ* chromosomal locus. The  $P_{flhD}$ -*flhD-lacZ* fusion  
276 allows simultaneous monitoring of the transcriptional and translational regulation of *flhD* and the  
277  $P_{tet}$ -*flhD-lacZ*, monitors only the post-transcriptional regulation (Fig. 6-A). The mutations in the  
278 AsflhD promoter producing silencing and overexpression of AsflhD, were also introduced into both  
279 fusions. While loss of AsflhD ( $P_{AsflhD}^-$ ) had no impact on the expression of FlhD, overexpression of  
280 AsflhD ( $P_{AsflhD}^+$ ) resulted in decreased expression of *flhD-lacZ* expression from both the native and  
281  $P_{tet}$  promoters (Fig. 6-BC). Hence, overexpression of AsflhD leads to the reduction of *flhD* expression

irrespective of its promoter which suggests that AsflhD is involved in the direct regulation of *flhD* mRNA and/or translational levels and not *via* an effect on the *flhD* promoter.

Finally, we determined the effect of RNase III inactivation on *flhD* mRNA in the mutant overexpressing AsflhD ( $P_{AsflhD}^+$ ). Northern blot confirms that, as expected, the abundance of *flhD* mRNA increases in the *rnc* strains overexpressing or not AsflhD (Fig. 6-D). Remarkably, the 220 nts long fragment observed upon RNase III inactivation (Figs. 4-B, 5-B) strongly accumulates when AsflhD is overexpressed (Fig. 6-D). Hence this suggests that the increase in strength of the AsflhD promoter drives the accumulation of the small fragment corresponding to the 5'-UTR of *flhD* mRNA, presumably as a duplex with AsflhD and that both are rapidly degraded by RNase III. This short *flhD* fragment could either be generated by processing of longer *flhD* mRNA or correspond to premature transcriptional termination of *flhD* mRNA. In summary, we show that AsflhD is involved in the repression of the expression of *flhD* at the post-transcriptional level.

#### *Mutual repression of transcriptional elongation by AsflhD and flhD in vitro*

To determine whether AsflhD can repress the transcription of *flhD*, we performed *in vitro* transcription experiments using a DNA template corresponding to the *flhD* gene from 76 nts before to 388 nts after the transcription start site of *flhD*, which allows the transcription of a 388 nts *flhD* RNA and of a 335 nts AsflhD RNA (Fig. 7-A). We compared the abundance of both transcripts synthesized from this latter DNA fragment to those generated from templates carrying the promoter mutations leading to either silencing ( $P_{AsflhD}^-$ ) or overexpression ( $P_{AsflhD}^+$ ) of AsflhD. *In vitro* transcription assays were performed in a single round of elongation in the presence of heparin and with RNA polymerase (RNAP) pre-bound to templates in the absence of RNA, hence observed effects are restricted to the elongation step and should be independent of the initiation of transcription. The results correlate with *in vivo* data even though the amplitude of the effects is

306 different. Figure 7 shows that expression of AsflhD is strongly impaired (10-fold) on the template  
307 carrying the silencing ( $P_{AsflhD}^-$ ) mutation and increased (2.5-fold) from the template carrying the  
308 overexpression ( $P_{AsflhD}^+$ ) mutation of AsflhD (Fig. 7-B orange bars). Also, as *in vivo* (Fig. 6-B), AsflhD  
309 silencing does not affect the level of the *flhD* RNA, while its overexpression in *cis* results in a  
310 decrease of the transcription of the *flhD* RNA (40%) (Fig. 7B purple bars). cAMP/CAP is known to  
311 activate the transcription of *flhD* by binding to a sequence located 72 nts upstream from the TSS of  
312 *flhD* (45). As expected, its addition increased the transcription of *flhD*, which was still reduced by  
313 AsflhD overexpression (Fig. 7-B left). The role of AsflhD in the repression of *flhD* transcription  
314 elongation, was further confirmed by using a template where the  $P_{tet}$  promoter replaced the  $P_{flhD}$   
315 promoter (Fig. S3-A) producing the same 388 nts *flhD* RNA but a shorter (260 nts) AsflhD RNA.  
316 Similar results were observed from the templates carrying the  $P_{AsflhD}$  silencing and overexpression  
317 mutations (Fig. S3-B). We conclude that overexpression of AsflhD *in cis* leads to the repression of  
318 transcription elongation of *flhD*, which seems to be independent of the transcription level and of  
319 the promoter expressing *flhD*.

320 We then determined the effect of purified AsflhD or *flhD* RNA addition on the transcription of both  
321 *flhD* and AsflhD using the same linear DNA templates. Figure 7-C shows that addition of increasing  
322 amount of AsflhD led to a linear decrease of *flhD* while not affecting the accumulation of AsflhD.  
323 The reciprocal assay by adding increasing concentrations of purified *flhD* RNA decreased linearly the  
324 amount of AsflhD synthesized, while the amount of *flhD* was not affected. We performed the same  
325 assay with the shorter template carrying the  $P_{tet}$  promoter and observed similar results (Fig. S3-C).  
326 In summary, AsflhD represses the transcription elongation of *flhD* both in *cis* and in *trans*,  
327 independently of the promoter and its expression level. Thus, we propose that AsflhD asRNA and  
328 *flhD* mRNA are involved in their mutual transcriptional attenuation in which the interaction of one

329 molecule with the other leads to a reduction in transcription *via* an alteration of transcription  
330 elongation.

331  
332 *AsflhD* represses the transcription of *flhD* in *trans* in *vivo*

333 To confirm *in vivo* the ability of *AsflhD* to repress the transcription of *flhD* in *trans*, *AsflhD* was  
334 overexpressed from a plasmid, under the control of a  $P_{tac}$  promoter inducible by IPTG. The short 242  
335 nts long *AsflhD* is transcribed from the +1 to the +220 nt relative to the TSS of *AsflhD* with a *rrnBT2*  
336 terminator to enable its stabilization. In the *rnc* mutant, this transcript is further processed with the  
337 appearance of the characteristic 160 nts intermediate (Figs. 8-A, 1-D). It is noteworthy that this  
338 smaller fragment is slightly longer than in the endogenous *AsflhD* suggesting that it may correspond  
339 to a 3'-fragment of *AsflhD*. Overexpression of *AsflhD* upon addition of IPTG decreases the  
340 abundance of *flhD* mRNA both in the wt strain (30%) and in the mutant (20%) (Fig. 8-B), in  
341 agreement with our *in vitro* data (Figs. 7-C, S3-C). Thus, consistent with previous experiments, *trans*  
342 overexpression of *AsflhD* *in vivo* reduces the abundance of *flhD* mRNA but it is less effective than  
343 *AsflhD* expressed from the *flhD* locus *in cis* and this effect is mostly independent of RNase III activity.

344 To further confirm that *AsflhD* can impact *flhD* expression *in vivo*, we measured the expression of  
345 the *flhD-lacZ* reporter fusions when *AsflhD* is overexpressed from the plasmid. The overexpression  
346 induces about a 30-40% decrease in the expression of *flhD* both from the  $P_{flhD}$ -*flhD-lacZ* and the  $P_{tet}$ -  
347 *flhD-lacZ* fusions (Fig. 8-CD, dark grey). However, overexpression of *AsflhD* from the plasmid in the  
348 strain where expression of *AsflhD* is already upregulated, by the presence of  $P_{AsflhD}^+$  mutation in *cis*,  
349 has no or little additive effect on the final repression (Fig. 8-CD, dark green). It should be  
350 emphasized that these effects are independent of the *flhD* promoter (native  $P_{flhD}$  or  $P_{tet}$ ). In  
351 summary, we demonstrate that *AsflhD* RNA is involved in the transcriptional attenuation of *flhD*  
352 both in *cis* and in *trans*, and that it does not involve the native  $P_{flhD}$  promoter.



353

354 *AsflhD* controls the motility cascade

355 The *flhDC* operon encodes the FlhD<sub>4</sub>C<sub>2</sub> transcriptional master regulator of the swimming motility, so  
356 we next investigated the effect of *AsflhD* overexpression on the expression of key factors belonging  
357 to the motility cascade. This cascade of gene activation is divided into three classes of genes (46).  
358 The *flhDC* operon encodes the only Class I protein, FlhD<sub>4</sub>C<sub>2</sub>, which is required for expression of class  
359 II genes, which in turn control class III genes. We tested the effect of *AsflhD* on representative Class  
360 II and Class III genes. The selected class II genes are *fliA* that encodes FliA, the sigma factor for class  
361 III motility genes, and *flgB* that encodes FlgB, the main component of the flagella rod. The *fliC* gene  
362 is a class III gene, located upstream from the *fliA* gene, and it encodes the main component of  
363 flagella, FliC. The amounts of *fliA*, *flgB* and *fliC* mRNAs are all very strongly reduced upon  
364 overexpression of *AsflhD* from its endogenous locus in the mid-log phase (Fig. 9-ABC). As the  
365 reduction is considerably stronger than the effect on *flhD* itself, this implies that the effect of *AsflhD*  
366 overexpression is amplified compared to that on *flhD*, similarly to what was previously reported for  
367 transcriptional regulators of *flhD* expression (47-48). Furthermore, a bioinformatics search  
368 (TargetRNA2 (49)) for possible direct *trans* targets of *AsflhD* found no candidates amongst genes  
369 from the motility cascade. In addition, the abundance of *flgB* and *fliC* mRNAs in late-log phase  
370 slightly increases relatively to mid-log phase (Fig. S4-AB) therefore this is consistent with the  
371 hypothesis that *cis*-overexpression of *AsflhD* limits the level but also delays the timing for the  
372 induction of the motility cascade.

373 Finally, we analyzed the effect of *AsflhD* on the motility of bacteria on low-agar plates and observed  
374 that overexpression of *AsflhD* from both the *flhD* locus ( $P_{AsflhD}^+$ ) or from the plasmid decreases the  
375 swimming speed on plates (50% and 30% respectively) while the combined *cis* and *trans*  
376 overexpression of *AsflhD* induces a stronger reduction of the swimming speed (70%) (Fig. 9-D).

377 These results enforce our hypothesis that the observed strong reduction of the motility cascade  
378 effectors (*fliA*, *flgB* and *fliC* genes) in mid-log phase reflects a delayed induction rather than actually  
379 inhibiting expression.

380 In summary, both *cis* and *trans* overexpression of AsflhD reduces transcription of *flhD*, which in turn  
381 leads to repression of the whole cascade of motility and a reduction in swimming speed. Of note,  
382 *cis*-expressed AsflhD appears to be more effective than the *trans*-expressed to control *flhD*  
383 expression (Fig. 8-CD) and bacterial motility (Fig. 9-D). We hypothesize that the overexpression of  
384 AsflhD delays the induction of *flhD* to maintain the timing of the motility program.

## 386 Discussion

387 Regulatory RNA molecules are often part of complex genetic networks in bacteria. They correspond  
388 to a heterogeneous class of molecules that differ in gene organization, size and function. Our goal  
389 was to detect, identify and investigate the function of some antisense transcripts in *E. coli*. We  
390 compared the transcriptomes of an *rnc* mutant to that of a wt strain and selected candidate  
391 asRNAs. We validated the presence of discrete transcripts, only detected in the *rnc* mutant, which  
392 were complementary to *crp*, *ompR*, *phoP* and *flhD* genes. We identified the promoters encoding  
393 AsphoP and AsflhD, both producing transcripts convergently expressed towards the promoters of  
394 their target genes *phoP* and *flhD*. We show that RNase III is involved in the decay of both AsphoP  
395 and *phoP*. AsflhD is highly unstable and it is degraded independently by RNase E and RNase III. The  
396 promoter of AsflhD is induced by a heat-shock and is partially dependent on RpoE. We reveal that  
397 AsflhD is involved in transcriptional attenuation of *flhD* by being able to repress *flhD* transcription  
398 both *in vitro* and *in vivo* when overexpressed in *cis* or in *trans* (Figs. 7-8). Remarkably, *in vitro*, *flhD*  
399 RNA in *trans* could also drive the transcriptional attenuation of AsflhD asRNA (Fig. 7), suggesting  
400 that the interaction of the two RNAs can perturb the transcription elongation of the other transcript

401 *in vivo*. The relatively small effect of AsflhD on *flhD* expression has important consequences for the  
402 FlhD<sub>4</sub>C<sub>2</sub> regulon since, the *cis* overexpression of AsflhD lead to decreased expression of three  
403 representative genes of the motility cascade; *fliA*, *flgB* and *fliC*, and reduced the swimming speed  
404 (Fig. 9). In conclusion, this work demonstrates that AsflhD is an additional player acting in the  
405 already complex regulatory process controlling *flhDC*. Our view of how AsflhD, by co-  
406 transcriptionally fine-tuning the expression of *flhD*, reinforces the control of the motility cascade, is  
407 shown in Figure 10.

#### 408 409 *Conservation of the promoters of AsflhD and AsphoP*

410 asRNAs are poorly conserved among bacteria (50), but if this can be expected for asRNAs from  
411 intergenic regions with low sequence constraints, nucleotide changes within the coding region of  
412 the target risk to upset the function of the ORF and could be counterselected. AsflhD corresponds  
413 almost entirely to the 5'-UTR of *flhD* but with the promoter located in the ORF, which is fairly well  
414 conserved in enterobacteria (Fig. 3-A). The presence of multiple critical amino-acids along the  
415 protein, whose modification leads to decreased motility, could explain the conservation of the  
416 amino sequence of FlhD among Gram-negative bacteria (51). Thus, the conservation of the  
417 promoter of AsflhD could be the result of direct selection for FlhD activity or for the regulatory  
418 function of AsflhD controlling the expression of FlhD in these bacteria. In spite of the close similarity  
419 between the AsflhD promoter regions of *Salmonella enterica* sv Typhimurium and that of *E. coli* (Fig.  
420 3-A), it would be interesting to examine whether AsflhD is also expressed and controls *flhD* levels in  
421 *S. enterica*, since it was reported that *E. coli flhDC* operon is expressed in *S. enterica* but at  
422 significantly lower levels (52).

423 The promoter of AsflhD shows low activity *in vivo* despite a -10 consensus with an extended -10 5'-  
424 TG-3' element and a -35 element which is functional since the P<sub>AsflhD</sub><sup>-</sup> mutation decreased the

425 promoter activity. In the case of AsphoP, the promoter located in the central region of the *phoP*  
426 ORF is not conserved in other enterobacteria. In *E. coli*, the two G to A changes in the -10 sequence  
427 of the promoter of AsphoP, compared to other bacteria make a relatively good consensus -10  
428 (CATAAT) which can account for the high level of expression of AsphoP (Fig. 2-E) compared to  
429 AsflhD (Fig. 3-C). The lack of conservation in other bacteria suggests that, on the contrary to AsflhD,  
430 any function of AsphoP may be unique to *E. coli* where it was most likely acquired.

#### 431 432 *Role of RNase III in the degradation of asRNAs-mRNAs*

433 We demonstrate that RNase III initiates the rapid degradation of AsphoP and AsflhD RNAs, at the  
434 same time it is also involved in the *flhD* degradation. The formation of an intermolecular RNA  
435 duplex can trigger the RNase III-mediated degradation of a mRNA as in the case of the *puf* mRNA  
436 upon binding to asPcrL in *Rhodobacter sphaeroides* or a sRNA upon binding to its target, as in the  
437 case of the sRNA RyhB upon binding to the *sodB* mRNA (53). However, RNase III cleavage may  
438 generate a shorter but more stable mRNA and so can have a positive role on gene expression (19,  
439 54). In the case of AsphoP the *rnc* mutation reduces promoter activity (Fig. 2-E) but greatly increases  
440 AsphoP stability (Fig. 2-A). In the case of AsflhD, RNase III allows the recycling of the products of  
441 transcriptional attenuation between *flhD* and AsflhD (Fig. 7-A).

#### 442 443 *Mechanism of regulation by AsflhD*

444 *Cis*-encoded regulatory elements and asRNAs have the advantage of their close location facilitating  
445 their access to their target. Binding of AsflhD to the 5'-UTR of *flhD* mRNA can have multiple  
446 consequences on the interaction of other *trans*-acting regulators, known to affect *flhD* expression.  
447 For example, after removal of the 5'-triphosphate, CsrA binds two regions of the *flhD* mRNA and  
448 protects it by competing with RNase E (6, 55). Closer to the translational start, the binding of the

449 McaS sRNA is required to expose the ribosome binding site and activate translation. On the  
450 contrary, binding of the sRNAs OxyS, ArcZ, OmrA and OmrB represses translation (5, 56). AsflhD  
451 binding can interact at any of these sites along the *flhD* mRNA to compete with the RNase E-  
452 mediated degradation pathway and/or the sRNA control of translation. Our results clearly  
453 demonstrated that AsflhD represses the transcription of *flhD* but without excluding that AsflhD may  
454 also be involved in the control of the translation of *flhD* mRNA. However, it is difficult to assess  
455 whether AsflhD may have a direct effect on translation or an indirect effect *via* the competition with  
456 the other positive and negative post-transcriptional regulators of translation of *flhD*.

457 AsflhD and *flhD* mutually repress their transcription elongation. AsflhD interacting with the 5'-UTR  
458 of *flhD* mRNA, could either provoke the termination of transcription by transcriptional interference  
459 or by transcriptional attenuation (57), or drive the processing of *flhD* mRNA (*e.g.*, *via* RNase III) or  
460 inhibit translation. Diverse mechanisms of transcriptional attenuation have been described which  
461 are dependent on regulatory RNAs. For example, sRNA binding drives the premature Rho-  
462 dependent transcription termination of the *rpoS* mRNA (58). The asRNA RNA $\beta$  in *Vibrio anguillarum*  
463 promotes transcription termination on the *fatDCBA* polycistronic mRNA before RNA polymerase  
464 reaches the end of the *fatDCBAangRT* operon. Remarkably, the region where termination occurs  
465 does not contain any canonical terminator motif (59). The asRNA RnaG was also shown to stabilize a  
466 terminator structure upon binding to the *icsA* mRNA in *Shigella flexneri* (16). Similarly, the asRNA  
467 RNAIII binds to the leader region of the *repR* mRNA and favors the formation of a terminator  
468 structure in *Bacillus subtilis* (60). The asRNA anti-Q in *Enterococcus faecalis* is responsible for both  
469 transcriptional interference due to RNAPs collisions and attenuation by an uncharacterized  
470 mechanism (61). Our experiments do not detect the accumulation of a shorter transcript *in vitro*  
471 upon addition of one or the other of the transcripts suggesting that binding of AsflhD to *flhD* does

not stabilize a terminator structure but could rather modify the stability of the elongating RNAP leading to heterogenous 3'-termini as observed for *AsflhD* *in vivo* by cRT-PCR (Fig. 4-A).

### *Physiology of AsflhD*

Motility depends on the growth-rate due to the regulation of *flhD* (62). The expression of *flhD* peaks at the end of the exponential phase then decreases and is stabilized to an intermediate level during the stationary phase in *E. coli* (63). The temporal control of the motility cascade is maintained *via*, among other mechanisms, the expression of anti- $\sigma$  factor, FlgM, at the same time as FliA, in order to allow the expression of class II genes without inducing class III genes expression prematurely. When the basal part of the flagellum is assembled, FlgM is exported from the cytoplasm and FliA induces the expression of class III genes.

We show here that the  $P_{AsflhD}$  promoter is induced during a heat-shock likely *via* RpoE. Remarkably, the swimming motility behavior is down-regulated during a heat-shock. This was proposed to be due to both a lowered level of FlhD and the inefficient export of FlgM (64-65). Our results show that the up-regulation of *AsflhD* during the heat-shock reducing *flhD* expression could also contribute to the decrease in swimming motility. Thus, as well as providing a fine-tuning mechanism to coordinate the expression of *flhD*, a function of *AsflhD* could be help to maintain the motility cascade off in conditions where motility would be detrimental and/or too costly.

### **Outlook**

Our results demonstrate that the asRNA *AsflhD* is involved in a mutual transcriptional attenuation mechanism with its target *flhD* mRNA. Regulatory RNAs are far from being fully understood in bacteria and new mechanisms of action are likely to be discovered. Development of global approaches able to capture RNA-RNA and RNA-protein interaction (66-67) as well as prokaryotic

496 single cell RNA-seq (68) are likely to pave the way for the elucidation of the role of the widely  
497 distributed asRNAs which were, until recently mostly considered as pervasive transcriptional noise  
498 but for which the study of individual cells and molecules could be critical for the understanding of  
499 their function.

500

501

## 502 **Materials and methods**

### 503 *Bacterial strains and culture conditions*

504 Strains and plasmids used in this work are listed in table S1. Constructions and mutations were  
505 made by using primers given in table S2 and are described in Supplementary Materials and  
506 methods. Strains were grown in LB Miller medium at 37°C, or at 30°C and shifted to 42°C, 45°C or  
507 46°C for the heat-shock experiments. Appropriate antibiotics were added when required. IPTG was  
508 used at the indicated concentrations for induction of AsflhD from the pCA24N AsflhD plasmid and  
509 arabinose for RpoS from the pBAD18 plasmid.

### 511 *Northern blotting and RNA-seq analysis*

512 Total RNA was prepared from bacteria grown to the  $A_{600}$  0.4 using the hot-phenol procedure (69).  
513 Five  $\mu$ g of total RNA were electrophoresed either on 1% agarose, 1xTBE or 6% polyacrylamide gels  
514 (19/1), 7M urea, 1xTBE for analysis by northern blotting (70-71) along with RiboRuler High-Range  
515 marker (ThermoFisher) or radio-labeled Msp1-digested pBR322 (NEB). Membranes were hybridized  
516 with complementary RNA probes. Templates for the synthesis of the RNA probes were obtained by  
517 PCR amplification using the pair of “m” and “T7” oligonucleotides (Table S1). Probes were  
518 synthesized by T7 RNAP with [ $\alpha$ -<sup>32</sup>P]-UTP yielding uniformly labeled RNAs (72). Membranes were  
519 also probed with M1 or 5S as loading control by using 5'-end labeled primers (Table S2). An RNA-seq  
520 analysis was performed to compare the transcriptomes of the wild-type (N3433) and the RNase III  
521 deficient strain (IBPC633). Sample preparation for RNA-seq, 5'-RNA tagging and RNA-seq analysis  
522 were performed as in (25). Data have been deposited in the ArrayExpress database at EMBL-EBI  
523 under accession number [E-MTAB-9507](#) (M. Lejars, L.Kuhn, A. Maes, P. Hammann, E. Hajnsdorf  
524 manuscript in preparation).



525

526

### *β-galactosidase assays*

527

528

529

530

Cultures were initiated at  $A_{600}$  0.05 and sampled at  $A_{600}$  0.4 or in the case of the results presented in figure S2 also at  $A_{600}$  1.2. Samples (200  $\mu$ L) were lysed in 800  $\mu$ L PBS buffer with 10  $\mu$ L 0.1% SDS and 20  $\mu$ L chloroform.  $\beta$ -galactosidase activity was assayed as described (73), results are the mean of at least three biological replicates.

531

532

### *Circular RT-PCR*

533

534

535

536

Circular RT-PCR was performed with total RNA extracted from N3433 and IBPC633 treated with 5'-polyphosphatase. After circularization with T4 RNA ligase, mflhD2 was used to prime reverse transcription and mflhD6 and masflhD10 to generate PCR products (Table S2), which were cloned (74).

537

538

### *RNA band-shift assay and in vitro processing by RNase III*

539

540

541

542

543

544

545

546

547

DNA templates carrying a T7 promoter sequence were generated by PCR using the Term and T7 oligonucleotides (Table S2). They allow the transcription of the first 308 nts *flhD* and of the first 256 nts of *AsflhD*. RNAs were synthesized by T7 RNAP with [ $\alpha$ - $^{32}$ P]-UTP as a tracer and were gel purified. Transcripts 5'-end-labelling, hybridization, RNase III digestion and sample analysis were described in (74-76). Briefly, radioactive *AsflhD* was incubated with increasing concentrations of *flhD* mRNA under two conditions referred to as "native" (incubation in TMN buffer (20 mM Tris acetate, pH 7.5, 10 mM magnesium acetate, 100 mM sodium acetate for 5 min at 37°C) and "full RNA duplex" (initial denaturation at 90°C for 2 min, then incubation in 1xTE at 37°C for 30 min). The complexes were loaded on native polyacrylamide gels to control for hybridization efficiency or

548 submitted to *in vitro* processing by RNase III of *E. coli*. RNase III digestion of free 5'-radiolabeled  
549 AsflhD, *flhD* or complexed AsflhD with *flhD* was performed at 37°C in TMN buffer containing 1 µg  
550 tRNA for 15 min with RNase III (Epicentre). Samples were loaded on denaturing polyacrylamide gels  
551 together with an RNA alkaline ladder as in (75).

### 552 553 *In vitro* transcription assay

554 Single-round *in vitro* transcription experiments were carried out on linear templates as described in  
555 Supplementary materials and methods.

### 556 557 *Motility assay*

558 Stationary phase bacterial cultures (MG1655-B, ML241 (P<sub>AsflhD</sub><sup>+</sup>) carrying the pCA24N control (Ctl) or  
559 the pCA24N AsflhD (As) plasmid) were inoculated (2 µL) on soft-agar (0.2 g/L) SOB motility plates  
560 (containing 10<sup>-4</sup> M IPTG and 2.4 g/L MgSO<sub>4</sub>) at 37°C and pictures were taken using a Gel Doc  
561 (Biorad) imager at the beginning and the end of the linear swimming motility period (from 5 to 8  
562 hours). Swimming speed was then calculated as a function of time by comparing motility diameters.

563  
564 *Image treatment, quantifications and statistical analysis* are given in Supplementary Materials and  
565 Methods

566

567

568

## **Acknowledgements**

569

We thank C. Beloin and J-M Ghigo for providing strains and A. Kolb for the kind gifts of purified

570

RNAP core,  $\sigma^{70}$  and CAP. This work was supported by the Centre National de la Recherche

571

Scientifique (UMR8261), Université de Paris, Agence Nationale de la Recherche (asSUPYCO, ANR-12-

572

BSV6-0007-03 to E.H.), (RIBECO ANR-18-CE43-0010 to E. H.) and the “Initiative d’Excellence”

573

program from the French State (Grant “DYNAMO,” ANR-11-LABX-0011).

574

575

576

577

578 **Bibliography**

579. Keseler IM, Mackie A, Santos-Zavaleta A, Billington R, Bonavides-Martínez C, Caspi R, Fulcher C, Gama-  
580 Castro S, Kothari A, Krummenacker M, Latendresse M, Muñiz-Rascado L, Ong Q, Paley S, Peralta-Gil M,  
581 Subhraveti P, Velázquez-Ramírez DA, Weaver D, Collado-Vides J, Paulsen I, Karp PD. 2016. The EcoCyc  
582 database: reflecting new knowledge about *Escherichia coli* K-12. *Nucleic Acids Res* 45:543-550.
583. Theodorou MC, Theodorou EC, Kyriakidis DA. 2012. Involvement of AtoSC two-component system in  
584 *Escherichia coli* flagellar regulon. *Amino Acids* 43:833-844.
585. Lemke JJ, Durfee T, Gourse RL. 2009. DksA and ppGpp Directly Regulate Transcription of the *Escherichia*  
586 *coli* Flagellar Cascade. *Mol Microbiol* 74:1368-1379.
587. Mizushima T, Koyanagi R, Katayama T, Miki T, Sekimizu K. 1997. Decrease in expression of the master  
588 operon of flagellin synthesis in a dnaA46 mutant of *Escherichia coli*. *Biol Pharm Bull* 20:327-331.
589. De Lay N, Gottesman S. 2012. A complex network of small non-coding RNAs regulate motility in  
590 *Escherichia coli*. *Mol Microbiol* 86:524-538.
591. Yakhnin AV, Baker CS, Vakulskas CA, Yakhnin H, Berezin I, Romeo T, Babitzke P. 2013. CsrA activates  
592 *flhDC* expression by protecting *flhDC* mRNA from RNase E-mediated cleavage. *Mol Microbiol* 87:851-  
593 866.
594. Lejars M, Hajnsdorf E. 2020. The world of asRNAs in Gram-negative and Gram-positive bacteria. *Biochim*  
595 *Biophys Acta Gen Reg Mech* 1863.
596. Hör J, Matera G, Vogel J, Gottesman S, Storz G. 2020. Trans-Acting Small RNAs and Their Effects on Gene  
597 Expression in *Escherichia coli* and *Salmonella enterica*. *EcoSal Plus* doi:10.1128/ecosalplus.ESP-0030-  
598 2019.
599. Dornenburg JE, DeVita AM, Palumbo MJ, Wade JT. 2010. Widespread Antisense Transcription in  
600 *Escherichia coli*. *mBio* 1.

6010. Wade JT, Grainger DC. 2014. Pervasive transcription: illuminating the dark matter of bacterial  
602 transcriptomes. *Nat Rev Microbiol* 12:647-653.
6011. Lejars M, Kobayashi A, Hajnsdorf E. 2019. Physiological roles of antisense RNAs in prokaryotes.  
604 *Biochimie* 164:3-16.
6012. Masachis S, Darfeuille F. 2018. Type I Toxin-Antitoxin Systems: Regulating Toxin Expression via Shine-  
606 Dalgarno Sequence Sequestration and Small RNA Binding. *Microbiol Spectr* 6.
6013. Malmgren C, Wagner EGH, Ehresmann C, Ehresmann B, Romby P. 1997. Antisense RNA Control of  
608 Plasmid R1 Replication. The dominant product of the antisense RNA-mRNA binding is not a full RNA  
609 duplex. *J Biol Chem* 272:12508-12512.
6114. Darfeuille F, Unoson C, Vogel J, Wagner EG. 2007. An antisense RNA inhibits translation by competing  
611 with standby ribosomes. *Mol Cell* 26:381-392.
6115. André G, Even S, Putzer H, Burguière P, Croux C, Danchin A, Martin-Verstraete I, Soutourina O. 2008. S-  
613 box and T-box riboswitches and antisense RNA control a sulfur metabolic operon of *Clostridium*  
614 *acetobutylicum*. *Nucleic Acids Res* 36:5955-5969.
6116. Giangrossi M, Prosseda G, Tran CN, Brandi A, Colonna B, Falconi M. 2010. A novel antisense RNA  
616 regulates at transcriptional level the virulence gene *icsA* of *Shigella flexneri*. *Nucleic Acids Res* 38:3362-  
617 3375.
6117. Kolb FA, Malmgren C, Westhof E, Ehresmann C, Ehresmann B, Wagner EG, Romby P. 2000. An unusual  
619 structure formed by antisense-target RNA binding involves an extended kissing complex with a four-way  
620 junction and a side-by-side helical alignment. *Rna* 6:311-24.
6218. Opdyke JA, Kang J-G, Storz G. 2004. GadY, a Small-RNA Regulator of Acid Response Genes in *Escherichia*  
622 *coli*. *J Bacteriol* 186:6698-6705.
6219. Opdyke JA, Fozo EM, Hemm MR, Storz G. 2011. RNase III Participates in GadY-Dependent Cleavage of  
624 the *gadX-gadW* mRNA. *J Mol Biol* 406:29-43.

6220. Peters JM, Mooney RA, Grass JA, Jessen ED, Tran F, Landick R. 2012. Rho and NusG suppress pervasive  
626 antisense transcription in *Escherichia coli*. *Genes Dev* 26:2621-2633.
6221. Conway T, Creecy JP, Maddox SM, Grissom JE, Conkle TL, Shadid TM, Teramoto J, San Miguel P, Shimada  
628 T, Ishihama A, Mori H, Wanner BL. 2014. Unprecedented High-Resolution View of Bacterial Operon  
629 Architecture Revealed by RNA Sequencing. *mBio* 5.
6302. Lybecker M, Zimmermann B, Bilusic I, Tukhtubaeva N, Schroeder R. 2014. The double-stranded  
631 transcriptome of *Escherichia coli*. *Proc Natl Acad Sci U S A* 111:3134-3139.
6323. Thomason MK, Bischler T, Eisenbart SK, Forstner KU, Zhang A, Herbig A, Nieselt K, Sharma CM, Storz G.  
633 2015. Global transcriptional start site mapping using differential RNA sequencing reveals novel antisense  
634 RNAs in *Escherichia coli*. *J Bacteriol* 197:18-28.
6324. Huang L, Deighan P, Jin J, Li Y, Cheung H-C, Lee E, Mo SS, Hoover H, Abubucker S, Finkel N, McReynolds  
636 L, Hochschild A, Lieberman J. 2020. *Tombusvirus* p19 Captures RNase III-Cleaved Double-Stranded RNAs  
637 Formed by Overlapping Sense and Antisense Transcripts in *Escherichia coli*. *mBio* 11:e00485-20.
6325. Maes A, Gracia C, Innocenti N, Zhang K, Aurell E, Hajnsdorf E. 2017. Landscape of RNA polyadenylation  
639 in *E. coli*. *Nucleic Acids Res* 45:2746-2756.
6406. Stead MB, Marshburn S, Mohanty BK, Mitra J, Castillo LP, Ray D, van Bakel H, Hughes TR, Kushner SR.  
641 2011. Analysis of *Escherichia coli* RNase E and RNase III activity *in vivo* using tiling microarrays. *Nucleic*  
642 *Acids Res* 39:3188-3203.
6427. Hanamura A, Aiba H. 1991. Molecular mechanism of negative autoregulation of *Escherichia coli crp*  
644 gene. *Nucleic Acids Res* 19:4413-4419.
6428. Okamoto K, Freundlich M. 1986. Mechanism for the autogenous control of the *crp* operon:  
646 transcriptional inhibition by a divergent RNA transcript. *Proc Natl Acad Sci U S A* 83:5000-5004.
6429. Wurtzel ET, Chou MY, Inouye M. 1982. Osmoregulation of gene expression. I. DNA sequence of the  
648 *ompR* gene of the *ompB* operon of *Escherichia coli* and characterization of its gene product. *J Biol Chem*  
649 257:13685-13691.

6500. Kenney LJ, Anand GS. 2020. EnvZ/OmpR Two-Component Signaling: An Archetype System That Can  
651 Function Noncanonically. *EcoSal Plus* 9.
6521. Pratt LA, Hsing W, Gibson KE, Silhavy TJ. 1996. From acids to osmZ: multiple factors influence synthesis  
653 of the OmpF and OmpC porins in *Escherichia coli*. *Mol Microbiol* 20:911-7.
6542. Stincone A, Daudi N, Rahman AS, Antczak P, Henderson I, Cole J, Johnson MD, Lund P, Falciani F. 2011. A  
655 systems biology approach sheds new light on *Escherichia coli* acid resistance. *Nucleic Acids Res* 39:7512-  
656 28.
6573. Zwir I, Shin D, Kato A, Nishino K, Latifi T, Solomon F, Hare JM, Huang H, Groisman EA. 2005. Dissecting  
658 the PhoP regulatory network of *Escherichia coli* and *Salmonella enterica*. *Proceedings of the National*  
659 *Academy of Sciences of the United States of America* 102:2862.
6604. Groisman EA, Hollands K, Kriner MA, Lee EJ, Park SY, Pontes MH. 2013. Bacterial Mg<sup>2+</sup> homeostasis,  
661 transport, and virulence. *Annu Rev Genet* 47:625-46.
6625. Bertin P, Terao E, Lee EH, Lejeune P, Colson C, Danchin A, Collatz E. 1994. The H-NS protein is involved in  
663 the biogenesis of flagella in *Escherichia coli*. *J Bacteriol* 176:5537-5540.
6646. Santos-Zavaleta A, Salgado H, Gama-Castro S, Sánchez-Pérez M, Gómez-Romero L, Ledezma-Tejeida D,  
665 García-Sotelo JS, Alquicira-Hernández K, Muñiz-Rascado LJ, Peña-Loredo P, Ishida-Gutiérrez C,  
666 Velázquez-Ramírez DA, Del Moral-Chávez V, Bonavides-Martínez C, Méndez-Cruz CF, Galagan J, Collado-  
667 Vides J. 2019. RegulonDB v 10.5: tackling challenges to unify classic and high throughput knowledge of  
668 gene regulation in *E. coli* K-12. *Nucleic Acids Res* 47:D212-d220.
6697. Apirion D, Watson N. 1978. Ribonuclease III is involved in motility of *Escherichia coli*. *J Bacteriol*  
670 133:1543-1545.
6718. Mitchell JE, Zheng D, Busby SJW, Minchin SD. 2003. Identification and analysis of 'extended -10'  
672 promoters in *Escherichia coli*. *Nucleic Acids Res* 31:4689-4695.

6739. Koo BM, Rhodius VA, Campbell EA, Gross CA. 2009. Dissection of recognition determinants of  
674 *Escherichia coli* sigma32 suggests a composite -10 region with an 'extended -10' motif and a core -10  
675 element. Mol Microbiol 72:815-29.
6760. Rhodius VA, Suh WC, Nonaka G, West J, Gross CA. 2005. Conserved and Variable Functions of the  $\sigma E$   
677 Stress Response in Related Genomes. PLOS Biol 4.
6781. Thompson KM, Rhodius VA, Gottesman S. 2007. SigmaE regulates and is regulated by a small RNA in  
679 *Escherichia coli*. J Bacteriol 189:4243-4256.
6802. Ades SE, Connolly LE, Alba BM, Gross CA. 1999. The *Escherichia coli* sigma(E)-dependent  
681 extracytoplasmic stress response is controlled by the regulated proteolysis of an anti-sigma factor.  
682 Genes Dev 13:2449-61.
6833. Rouvière PE, De Las Peñas A, Meccas J, Lu CZ, Rudd KE, Gross CA. 1995. *rpoE*, the gene encoding the  
684 second heat-shock sigma factor, sigma E, in *Escherichia coli*. EMBO J 14:1032-1042.
6854. Gruber AR, Lorenz R, Bernhart SH, Neuböck R, Hofacker IL. 2008. The Vienna RNA websuite. Nucleic  
686 Acids Res 36:W70-4.
6875. Soutourina O, Kolb A, Krin E, Laurent-Winter C, Rimsky S, Danchin A, Bertin P. 1999. Multiple control of  
688 flagellum biosynthesis in *Escherichia coli*: role of H-NS protein and the cyclic AMP-catabolite activator  
689 protein complex in transcription of the *flhDC* master operon. J Bacteriol 181:7500-7508.
6906. Fitzgerald DM, Bonocora RP, Wade JT. 2014. Comprehensive mapping of the *Escherichia coli* flagellar  
691 regulatory network. PLoS Genet 10:e1004649.
6927. Lehnen D, Blumer C, Polen T, Wackwitz B, Wendisch VF, Uden G. 2002. LrhA as a new transcriptional  
693 key regulator of flagella, motility and chemotaxis genes in *Escherichia coli*. Mol Microbiol 45:521-532.
6948. Kim YJ, Im SY, Lee JO, Kim OB. 2016. Potential Swimming Motility Variation by AcrR in *Escherichia coli*. J  
695 Microbiol Biotechnol 26:1824-1828.
6969. Kery MB, Feldman M, Livny J, Tjaden B. 2014. TargetRNA2: identifying targets of small regulatory RNAs  
697 in bacteria. Nucleic Acids Res 42:W124-W129.



6950. Raghavan R, Sloan DB, Ochman H. 2012. Antisense Transcription Is Pervasive but Rarely Conserved in  
699 Enteric Bacteria. *mBio* 3.
7051. Campos A, Matsumura P. 2001. Extensive alanine scanning reveals protein-protein and protein-DNA  
701 interaction surfaces in the global regulator FlhD from *Escherichia coli*. *Mol Microbiol* 39:581-594.
7052. Albanna A, Sim M, Hoskisson PA, Gillespie C, Rao CV, Aldridge PD. 2018. Driving the expression of the  
703 *Salmonella enterica* sv Typhimurium flagellum using flhDC from *Escherichia coli* results in key regulatory  
704 and cellular differences. *Sci Rep* 8:16705.
7053. Afonyushkin T, Večerek B, Moll I, Bläsi U, Kaberdin VR. 2005. Both RNase E and RNase III control the  
706 stability of *sodB* mRNA upon translational inhibition by the small regulatory RNA RyhB. *Nucleic Acids Res*  
707 33:1678-1689.
7054. Aiso T, Kamiya S, Yonezawa H, Gamou S. 2014. Overexpression of an antisense RNA, ArrS, increases the  
709 acid resistance of *Escherichia coli*. *Microbiol* 160:954-961.
7155. Wei BL, Brun-Zinkernagel AM, Simecka JW, Pruss BM, Babitzke P, Romeo T. 2001. Positive regulation of  
711 motility and *flhDC* expression by the RNA-binding protein CsrA of *Escherichia coli*. *Mol Microbiol* 40:245-  
712 256.
7156. Thomason MK, Fontaine F, De Lay N, Storz G. 2012. A small RNA that regulates motility and biofilm  
714 formation in response to changes in nutrient availability in *Escherichia coli*. *Mol Microbiol* 84:17-35.
7157. Naville M, Gautheret D. 2009. Transcription attenuation in bacteria: theme and variations. *Brief Funct*  
716 *Genomic Proteomic* 8:482-92.
7158. Sedlyarova N, Shamovsky I, Bharati BK, Epshtein V, Chen J, Gottesman S, Schroeder R, Nudler E. 2016.  
718 sRNA-Mediated Control of Transcription Termination in *E. coli*. *Cell* 167:111-121.e13.
7159. Stork M, Di Lorenzo M, Welch TJ, Crosa JH. 2007. Transcription Termination within the Iron Transport-  
720 Biosynthesis Operon of *Vibrio anguillarum* Requires an Antisense RNA. *J Bacteriol* 189:3479-3488.
7260. Brantl S, Birch-Hirschfeld E, Behnke D. 1993. RepR protein expression on plasmid pIP501 is controlled by  
722 an antisense RNA-mediated transcription attenuation mechanism. *J Bacteriol* 175:4052-4061.

7251. Chatterjee A, Johnson CM, Shu C-C, Kaznessis YN, Ramkrishna D, Dunny GM, Hu W-S. 2011. Convergent  
724 transcription confers a bistable switch in *Enterococcus faecalis* conjugation. Proc Natl Acad Sci USA  
725 108:9721-9726.
7262. Sim M, Koirala S, Picton D, Strahl H, Hoskisson PA, Rao CV, Gillespie CS, Aldridge PD. 2017. Growth rate  
727 control of flagellar assembly in *Escherichia coli* strain RP437. Sci Rep 7.
7283. Pruss BM, Matsumura P. 1997. Cell cycle regulation of flagellar genes. J Bacteriol 179:5602-5604.
7294. Maeda K, Imae Y, Shioi JI, Oosawa F. 1976. Effect of temperature on motility and chemotaxis of  
730 *Escherichia coli*. J Bacteriol 127:1039-1046.
7315. Rudenko I, Ni B, Glatter T, Sourjik V. 2019. Inefficient Secretion of Anti-sigma Factor FlgM Inhibits  
732 Bacterial Motility at High Temperature. iScience 16:145-154.
7336. Lalaouna D, Massé E. 2015. Identification of sRNA interacting with a transcript of interest using MS2-  
734 affinity purification coupled with RNA sequencing (MAPS) technology. Genomics data 5:136-138.
7357. Iosub IA, van Nues RW, McKellar SW, Nieken KJ, Marchioretto M, Sy B, Tree JJ, Viero G, Granneman S.  
736 2020. Hfq CLASH uncovers sRNA-target interaction networks linked to nutrient availability adaptation.  
737 eLife 9:e54655.
7388. Blattman SB, Jiang W, Oikonomou P, Tavazoie S. 2020. Prokaryotic single-cell RNA sequencing by *in situ*  
739 combinatorial indexing. Nat Microbiol doi:10.1038/s41564-020-0729-6.
7409. Braun F, Hajnsdorf E, Regnier P. 1996. Polynucleotide phosphorylase is required for the rapid  
741 degradation of the RNase E-processed *rpsO* mRNA of *Escherichia coli* devoid of its 3' hairpin. Mol  
742 Microbiol 19:997-1005.
7430. Hajnsdorf E, Regnier P. 1999. *E. coli rpsO* mRNA decay: RNase E processing at the beginning of the  
744 coding sequence stimulates poly(A)-dependent degradation of the mRNA. J Mol Biol 286:1033-1043.
7451. Hajnsdorf E, Carpousis AJ, Regnier P. 1994. Nucleolytic inactivation and degradation of the RNase III  
746 processed *pnp* message encoding polynucleotide phosphorylase of *Escherichia coli*. J Mol Biol 239:439-  
747 454.

7482. Hajnsdorf E, Regnier P. 2000. Host factor Hfq of *Escherichia coli* stimulates elongation of poly(A) tails by  
749 poly(A) polymerase I. Proc Natl Acad Sci U S A 97:1501-1505.
7503. Miller JH. 1972. Experiments in molecular genetics / Jeffrey H. Miller. Cold Spring Harbor Laboratory,  
751 New York.
7524. Fontaine F, Gasiorowski E, Gracia C, Ballouche M, Caillet J, Marchais A, Hajnsdorf E. 2016. The small RNA  
753 SraG participates in PNPase homeostasis. RNA 22:1560-1573.
7545. Folichon M, Arluison V, Pellegrini O, Huntzinger E, Regnier P, Hajnsdorf E. 2003. The poly(A) binding  
755 protein Hfq protects RNA from RNase E and exoribonucleolytic degradation. Nucleic Acids Res 31:7302-  
756 7310.
7576. Maikova A, Peltier J, Boudry P, Hajnsdorf E, Kint N, Monot M, Poquet I, Martin-Verstraete I, Dupuy B,  
758 Soutourina O. 2018. Discovery of new type I toxin-antitoxin systems adjacent to CRISPR arrays in  
759 *Clostridium difficile*. Nucleic Acids Res 46:4733-4751.
7607. Burgess RR. 2001. Sigma Factors, p 1831-1834. In Brenner S, Miller JH (ed), Encyclopedia of Genetics  
761 doi:<https://doi.org/10.1006/rwgn.2001.1192>. Academic Press, New York.
7628. Coornaert A, Chiaruttini C, Springer M, Guillier M. 2013. Post-transcriptional control of the *Escherichia*  
763 *coli* PhoQ-PhoP two-component system by multiple sRNAs involves a novel pairing region of GcvB. PLoS  
764 Genet 9:e1003156.
- 765
- 766
- 767
- 768

769

770

Table 1: Effect of *AsflhD* silencing and overexpression on *flhD* expression and stability

| Promoter                         | Relative abundance<br><i>flhD</i> at t0 (%) | <i>flhD</i> Half-life<br>(min) |
|----------------------------------|---------------------------------------------|--------------------------------|
| P <sub>AsflhD</sub>              | 100                                         | 0.57 ± 0.15                    |
| P <sub>AsflhD</sub> <sup>-</sup> | 65                                          | 0.54 ± 0.19                    |
| P <sub>AsflhD</sub> <sup>+</sup> | 64                                          | 0.45 ± 0.13                    |

771

772

MG1655-B (P<sub>AsflhD</sub>), ML73 (P<sub>AsflhD</sub><sup>-</sup>) and ML241 (P<sub>AsflhD</sub><sup>+</sup>) were grown to mid-log phase (A<sub>600</sub> 0.4) at

773

37°C. Sampling was performed at different times after addition of rifampicin (500 µg/mL) (t0) and

774

total RNA was subjected to northern blot analysis. The membranes were probed successively for

775

*flhD* and M1. The decay-rate of *flhD* mRNA was calculated as described in the “quantification and

776

statistical analysis” section of the supplementary materials and methods.

777

778

779

## 780 Legends

### 781 Figure 1: RNase III inactivation stabilizes asRNAs

782 The RNA-seq reads were aligned to the genome of reference (MG1655, GenBank identifier  
783 U00096.3, <https://www.ncbi.nlm.nih.gov/nucore/U00096.3>) and visualized with the Integrative  
784 Genomic Viewer (IGV) 2.4.2 software (<http://software.broadinstitute.org/software/igv/>). The  
785 fractions isolated during the RNA-seq analysis are color-coded; strand of the target gene in wt (dark  
786 blue) and in *rnc* mutant (light blue); strand of the asRNA gene in wt (red) and in *rnc* mutant  
787 (orange). Reads corresponding to transcription start site (TSS), processing sites (PSS) and internal  
788 fragments (INT) are indicated. The scale for the absolute number of reads identified is indicated on  
789 the top right of each lane. The schemes indicate the localization of the ORFs and known promoters  
790 (plain bent arrows) and the putative antisense promoters deduced from TSS data (dashed bent  
791 arrows).

792 Detection of asRNAs (orange triangle) to *crp* (A), *ompR* (B), *phoP* (C) and *flhD* (D). RNAs extracted  
793 from exponentially grown N3433 (wt) and IBPC633 (*rnc*) strains were analyzed on agarose or  
794 denaturing acrylamide gels and northern blots were probed by using pairs of complementary  
795 uniformly radio-labeled RNA probes to the same region of each target and a primer complementary  
796 to the 5S rRNA. A scheme of the probed loci is shown under each panel. The position of the probes  
797 relative to the DNA sequence is indicated by a dashed box. The putative asRNA promoter is  
798 indicated by a dashed orange bent arrow when it could be predicted from RNA-seq data while  
799 known promoters are indicated by plain arrows (purple for genes located on the opposite strand  
800 from the detected asRNA). To note, *crp* and *AsompR* were successively probed on the same  
801 membrane, thus they share the same loading control. The membranes shown for *phoP* and *AsphoP*  
802 correspond to zero time points of the stability experiment presented in figure 2-A. It should be  
803 noted that the *flhD* mRNA detected corresponds in size to the co-transcript *flhDC* (1200 nts).

805

806

*Figure 2: AsphoP and phoP levels are regulated by RNase III*

807

808

809

810

811

812

813

814

815

816

817

818

819

820

821

822

823

824

825

826

827

*Figure 3: Transcriptional regulation of AsflhD*

828

829

(A) Genetic structure of the *flhD* locus and alignment of the promoter sequence of AsflhD with the consensus sequences for the RpoD, RpoE, RpoH and RpoS-dependent promoters (39, 40, 77) and

830 with 8 Eubacterial species showing between 49-92 % identity of FlhD with *E. coli* (51). The position  
831 of the promoter of AsflhD (orange bent arrow), is indicated relative to the *flhD* translation start of  
832 *flhD* (+22). Nucleotide sequences correspond to the following bacteria, Eco, *Escherichia coli*  
833 MG1655 ([NC\\_000913.3](#)), Sen, *Salmonella enterica typhimurium* ([D43640](#)), Eca, *Erwinia carotovora*  
834 ([AF130387](#)), Sma, *Serratia marcescens* ([AF077334](#)), Sli, *Serratia liquefaciens* ([Q7M0S9](#)), Yen, *Yersinia*  
835 *enterocolitica* ([AF081587](#)), Xne, *Xenorhabdus nematophilus* ([AJ012828](#)), Pmi, *Proteus mirabilis*  
836 ([U96964](#)), Bbr, *Bordetella bronchiseptica* ([U17998](#)). (B) Genetic structure of the transcriptional  
837 AsflhD-*lacZ* reporter fusion (MG2114 P<sub>AsflhD</sub>). Mutations in red and in green were introduced to  
838 inactivate the promoter of AsflhD (P<sub>AsflhD</sub><sup>-</sup> in the strain ML239) and and to increase its activity  
839 (P<sub>AsflhD</sub><sup>+</sup> in the strain ML218) respectively. (C) Effect of mutations in AsflhD promoter on expression  
840 of P<sub>AsflhD</sub>-*lacZ* fusion. (D) Expression of P<sub>AsflhD</sub>-*lacZ* fusion in the wt (strain (MG2114 P<sub>AsflhD</sub>) before  
841 (30°C t=0) and after 15 and 60 minutes of upshift (46°C). (E) DJ624, DJ624-*rnc105* and their P<sub>lac</sub>-*rpoH*  
842 derivatives were grown at 30 °C. At mid-log phase, part of the cultures were shifted to 45°C with or  
843 without simultaneous addition of 0.1 mM IPTG. Sampling was performed 15 min later. Total RNA  
844 was analyzed by Northern blot, the membrane was probed for *rpoH*, AsflhD and M1. (F) Expression  
845 of P<sub>AsflhD</sub>-*lacZ* fusion in the wt strain (MG2114 P<sub>AsflhD</sub>) and *rseA* mutant (ML279) at 37°C. (G)  
846 Expression of P<sub>AsflhD</sub>-*lacZ* fusion in the strain carrying the P<sub>AsflhD</sub><sup>+</sup> fusion (ML218) and its *rseA*  
847 derivative strain (ML312) at 37°C. Values are means of three biological replicates for each strain,  
848 and error bars are standard deviations. Statistical significance was determined by a heteroscedastic  
849 two-tailed t test (\*\* for p-values ≤0.01 and \*\*\* for p-values ≤0.001). (H) MG1655-B (wt), ML73  
850 (P<sub>AsflhD</sub><sup>-</sup>) and ML241 (P<sub>AsflhD</sub><sup>+</sup>) and their *rnc* derivatives (respectively ML65, ML75 and ML341) were  
851 grown at 37°C until mid-log phase. Total RNA was analyzed by northern blotting. The membrane  
852 was probed successively for AsflhD and 5S or M1.

854 *Figure 4: Characterization of AsflhD*

855 (A) The sequenced reads following cRT-PCR are shown relative to the *flhD* locus. Each line  
856 represents one transcript. Transcripts were identified from both the wt strain (N3433) (in black) and  
857 from the *rnc* mutant (IBPC633) (in blue). The 5' and 3'-end positions are indicated relative to the TSS  
858 of *AsflhD*. The scheme shows the localization of the  $P_{AsflhD}$  transcript relative to  $P_{flhD}$ . (B) N3433 (wt)  
859 and its derivatives, *pnp*, *rnc*, *pnp-rnc*, *rne<sup>ts</sup>*, *rnc-rne<sup>ts</sup>* mutants (respectively N3433-*pnp*, IBPC633,  
860 IBPC633-*pnp*, N3431, IBPC637), were grown at 37°C until mid-log phase. Where indicated, cells  
861 were grown at 30°C and submitted to a heat-shock at 42°C for 15 min, in order to inactivate RNase E  
862 in the strain carrying the thermosensitive *rne<sup>ts</sup>* allele. Total RNA was analyzed by northern blotting.  
863 The membrane was probed successively for *AsflhD* and 5S.

864  
865 *Figure 5: RNase III is involved in the degradation of AsflhD asRNA and flhD mRNA in vivo*

866 (A) MG1655-B and its *rnc* derivative (ML65) were grown to mid-log phase at 37°C. At  $A_{600}$  0.4  
867 rifampicin (500 µg/mL) was added (t0) and sampling was performed at different times. Total RNA  
868 was extracted and subjected to northern blot analysis. The membranes were probed for *AsflhD*,  
869 *flhD* and 5S. The decay-rate of *flhD* mRNA was calculated as described in material and methods.

870  
871 *Figure 6: AsflhD repress the expression of flhD*

872 (A) Genetic structures of the  $P_{flhD}$ -*flhD-lacZ* (ML219) and  $P_{tet}$ -*flhD-lacZ* reporter fusions (ML233) and  
873 their derivatives containing the mutations leading to either silencing ( $P_{AsflhD}^-$ , in red, ML221 and  
874 ML235 respectively) or *cis*-overexpression ( $P_{AsflhD}^+$ , in green, ML226 and ML237 respectively) of  
875 *AsflhD*. Expression of (B)  $P_{flhD}$ -*flhD-lacZ* and (C)  $P_{tet}$ -*flhD-lacZ* reporter fusions (gray bars) and their  
876 derivatives ( $P_{AsflhD}^-$  in red and  $P_{AsflhD}^+$  in green) are given as β-galactosidase activity. Values are  
877 means of three biological replicates for each strain, and error bars are standard deviations.  
878 Statistical significance was determined by a heteroscedastic two-tailed t test (\*\*\* for p-values  
879 ≤0.001).



880 (D) MG1655-B (wt), ML241 ( $P_{AsflhD}^+$ ) and their *rnc* mutant derivatives (ML65 and ML341 respectively)  
881 were grown to mid-log phase ( $A_{600}$  0.4) at 37°C. Total RNA was extracted and subjected to northern  
882 blot analysis. The membrane was probed successively for *flhD* and for M1.

883  
884 *Figure 7: AsflhD is involved in the transcriptional attenuation of flhD*

885 (A) Schematic representation of the template used for the *in vitro* transcription assay carrying the  
886  $P_{flhD}$  promoter driving the expression of a 388 nts transcript (purple) and the  $P_{AsflhD}$  promoter driving  
887 the expression of a 335 nts transcript (orange). The linear DNA template was constructed using the  
888 oligonucleotides LM191 and LM9 (table S1) and corresponds to -76 to +388 of the *flhD* transcript  
889 relative to its TSS, with a 40 nts extension carrying the *rnnBT2* terminator (fragment length 504 bp).  
890 This fragment carries the native *flhD* promoter (-10 and -35 sites) and includes the cAMP/CAP site at  
891 -72 compared to the *flhD* TSS, at its upstream extremity.

892 *In vitro* transcription assays were performed as described in the Supplementary material and  
893 method (B) with or without addition of 100 nM CAP and 0.2 mM cAMP for 15 min at 37°C before  
894 addition of RNA polymerase, (C) with 100 nM CAP and 0.2 mM cAMP and the addition of *in vitro*  
895 purified AsflhD or *flhD* transcripts to the reaction at the indicated concentrations. Samples were  
896 analyzed on sequencing gels. Relative intensity of the indicated bands (*flhD* in purple and AsflhD in  
897 orange) were analyzed. Values are means of 6 (B) or 3 (C) replicates and error bars are standard  
898 deviations. Statistical significance was determined by a heteroscedastic two-tailed t test (\* for p-  
899 values  $\leq 0.05$ , \*\* for p-values  $\leq 0.01$  and \*\*\* for p-values  $\leq 0.001$ ).

900  
901 *Figure 8: AsflhD repress the expression of flhD in trans*

902 (A) MG1655-B (wt) and its *rnc* derivative (ML65) containing the control pCA24N (Ctl) or the pCA24N  
903 AsflhD (As) plasmids were grown to mid-log phase ( $A_{600}$  0.4) at 37°C in the presence of the indicated

904 concentration of IPTG. Total RNA was extracted and subjected to northern blot analysis. The  
905 membrane was probed for AsflhD and M1 RNA. (B) MG1655-B (wt) containing the control pCA24N  
906 (Ctl) or the pCA24N AsflhD (As) plasmids were grown to mid-log phase ( $A_{600}$  0.4) at 37°C in the  
907 presence of  $10^{-4}$  M IPTG. Total RNA was extracted and subjected to northern blot analysis. The  
908 membrane was probed for *flhD* using a probe corresponding to the beginning of the *flhD* ORF and  
909 M1 RNA. This *flhD* probe was used to detect *flhD* from the chromosomal locus and to avoid  
910 detection of *flhD* RNA transcribed from a plasmid promoter. Expression of (C)  $P_{flhD}$ -*flhD*-*lacZ*  
911 (ML219) and (D)  $P_{tet}$ -*flhD*-*lacZ* (ML233) reporter fusions (gray bars) and their  $P_{AsflhD}^+$  derivatives (in  
912 green, ML226 and ML237 respectively) containing the pCA24N control (Ctl, in dark grey) or the  
913 pCA24N AsflhD (As, in dark green) plasmid was determined in the presence of  $10^{-4}$  M of IPTG.  
914 Values are means of three biological replicates and error bars are standard deviations. Statistical  
915 significance was determined by a heteroscedastic two-tailed t test (\* for p-values  $\leq 0.05$ , \*\* for p-  
916 values  $\leq 0.01$  and \*\*\* for p-values  $\leq 0.001$ ).

917  
918 *Figure 9: AsflhD overexpression represses the cascade of motility*

919 MG1655-B (wt) and ML241 ( $P_{AsflhD}^+$ ) were grown at 37°C until mid-log phase. Total RNA was  
920 analyzed by northern blotting. The membranes were probed successively for (A) *fliA* and M1, for (B)  
921 *flgB* and M1 and for (C) *fliC* and M1. (D) Swimming motility speed is reduced upon overexpression in  
922 *cis* ( $P_{AsflhD}^+$  green bars) and in *trans* (pCA24N AsflhD dark grey and dark green bars) of AsflhD as  
923 observed on motility plates. Swimming speed ( $\text{cm}\cdot\text{h}^{-1}$ ) was calculated (see quantification and  
924 statistical analysis section of the supplementary material and method) on three biological replicates  
925 in the wt strain (MG1655-B) and in the  $P_{AsflhD}^+$  strain (ML241) carrying the pCA24N control (Ctl) or  
926 the pCA24N AsflhD (As) plasmid. Values are means of three biological replicates and error bars are  
927 standard deviations. Statistical significance was determined by a heteroscedastic two-tailed t test (\*  
928 for p-values  $\leq 0.05$ , \*\* for p-values  $\leq 0.01$  and \*\*\* for p-values  $\leq 0.001$ ).

929

930

*Figure 10: Schematic representation of the regulatory function of AsflhD*

931

When the motility cascade is off, low expression from the  $P_{flhD}$  promoter (purple bent arrow) is not

932

sufficient to maintain the expression of *flhDC*. The binding of AsflhD (orange) to *flhD* (purple) RNA

933

may occur co-transcriptionally and perturb the elongation of both molecules reinforcing the low

934

level expression of *flhD*. Upon encountering conditions where motility is required, the strong

935

induction of the  $P_{flhD}$  promoter changes the balance between the sense and the asRNA allowing

936

*flhDC* expression and activation of the motility cascade but where changes in AsflhD expression (e.g.

937

in response to heat) could modulate *flhD* expression. DNA is represented by grey lines and RNAP as

938

orange and purple oval shapes.

939

## Supplementary legends

*Figure S1: The transcription of AsflhD is not activated by RpoH and RpoS*

(A) Expression of *AsflhD-lacZ* fusion in the wt strain (MG2114  $P_{AsflhD}$ ) and its  $P_{lac-rpoH}$  derived strain (ML310) in the presence of  $10^{-3}$  M IPTG at 37°C was measured at  $OD_{600}$  1.2. (B) Expression of *AsflhD-lacZ* fusion in the wt strain (MG2114  $P_{AsflhD}$ ) carrying the pBAD18 control (Ctl) or pBAD18 *RpoS* (*rpoS*) in the presence of 0.1% arabinose at 37°C was measured at  $OD_{600}$  1.2. Values are means of three biological replicates and error bars are standard deviations. Statistical significance was determined by a heteroscedastic two-tailed t test (\*\* for p-values  $\leq 0.01$ ).

*Figure S2: In vitro cleavage of AsflhD and flhD RNAs by RNase III*

5'-radiolabeled *AsflhD* RNA (308 nts) was incubated with increasing concentrations of *flhD* mRNA (256 nts) under conditions referred as Native and Full RNA duplex conditions (Materials and Methods). Native *AsflhD-flhD* complexes were formed at 37°C for 5 min in TMN buffer, and full duplexes were obtained after a denaturation-annealing treatment in TE Buffer (2 min 90°C, 30 min 37°C before loading on native polyacrylamide gels to control for hybridization efficiency (A) or (B) *in vitro* processing by RNase III. RNase III digestion of free or complexed *AsflhD* in native conditions was performed at 37°C in TMN buffer containing 1 $\mu$ g tRNA with increasing concentration of RNase III per sample. Samples were analyzed on 8% polyacrylamide-urea gels. 5'-radiolabeled *flhD* (C) and *AsflhD* (D) were cleaved by RNase III (1 unit) *in vitro* at 4 and 2 main sites respectively (represented by a numbered red arrow). Mapping of the main *in vitro* cleavage sites of RNase III on *flhD* and *AsflhD* are indicated on their predicted secondary structures with the position of the main RNase III cleavage sites indicated relative to the TSS (according to (6) and Vienna RNA websuite (44)). The localization of RNase III cleavage site (black arrows) was performed by comparing the cleavage

963 fragment relative to an alkaline RNA ladder (NaOH) obtained by partial hydrolysis in NaOH of the  
964 respective labeled RNAs and radioactive markers.

965  
966 *Figure S3: AsflhD repression of the transcription of flhD is independent of the P<sub>flhD</sub> promoter*

967 (A) Schematic representation of the template used for the *in vitro* transcription assay carrying the  
968 P<sub>tet-flhD</sub> promoter driving the expression of a 388 nts transcript (purple) and the P<sub>AsflhD</sub> promoter  
969 driving the expression of a 260 nts transcript (orange). The DNA templates were constructed using  
970 the LM213 and LM9 oligonucleotides and carry chromosomal sequences starting at the *flhD* TSS  
971 with a 40 nts extension carrying the tetracycline promoter (78) so that the P<sub>tet</sub> transcription starts at  
972 the position of the *flhD* TSS. (B) *In vitro* transcription assays were performed on templates carrying  
973 wt and P<sub>AsflhD</sub><sup>+</sup> and P<sub>AsflhD</sub><sup>-</sup> mutations and (C) on the wt template after addition of *in vitro* synthesized  
974 AsflhD or *flhD* transcripts to the reaction at the indicated concentrations (supplementary material  
975 and method). Relative intensity of the indicated bands (*flhD* in purple and AsflhD in orange) were  
976 quantified as described in the “quantification and statistical analysis” with a number of sample n=6  
977 (B) and n=3 (C). Values are means of 6 (B) or 3 (C) replicates and error bars are standard deviations.  
978 Statistical significance was determined by a heteroscedastic two-tailed t test (\* for p-values ≤0.05,  
979 \*\* for p-values ≤0.01 and \*\*\* for p-values ≤0.001).

980  
981 *Figure S4: AsflhD overexpression repress and delay the induction of the motility cascade*

982 MG1655-B (wt) and ML241 (P<sub>AsflhD</sub><sup>+</sup>) were grown at 37°C until mid-log phase (A<sub>600</sub> = 0.4) or until late-  
983 log phase (A<sub>600</sub> = 1). Total RNA was analyzed by northern blotting. The membranes were probed  
984 successively for (A) *flgB* and M1 and for (B) *fliC* and M1.

985

986

# Figure 1

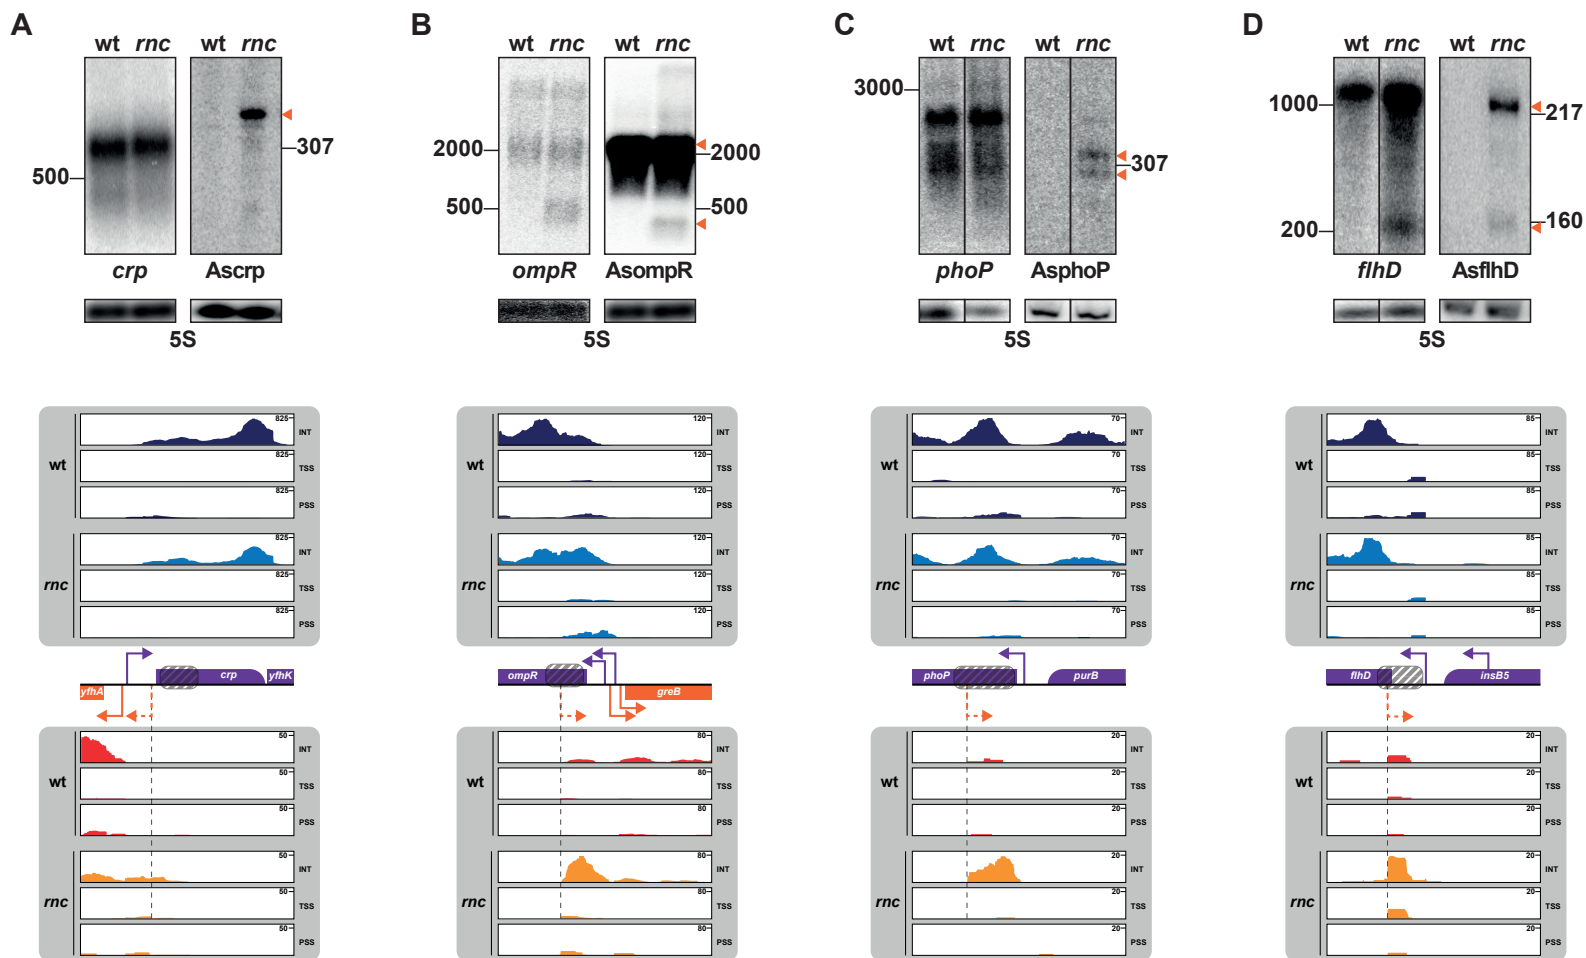

# Figure 2

A bioRxiv preprint doi: <https://doi.org/10.1101/2021.05.11.443715>; this version posted May 14, 2021. The copyright holder for this preprint (which was not certified by peer review) is the author/funder, who has granted bioRxiv a license to display the preprint in perpetuity. It is made available under aCC-BY-NC-ND 4.0 International license.

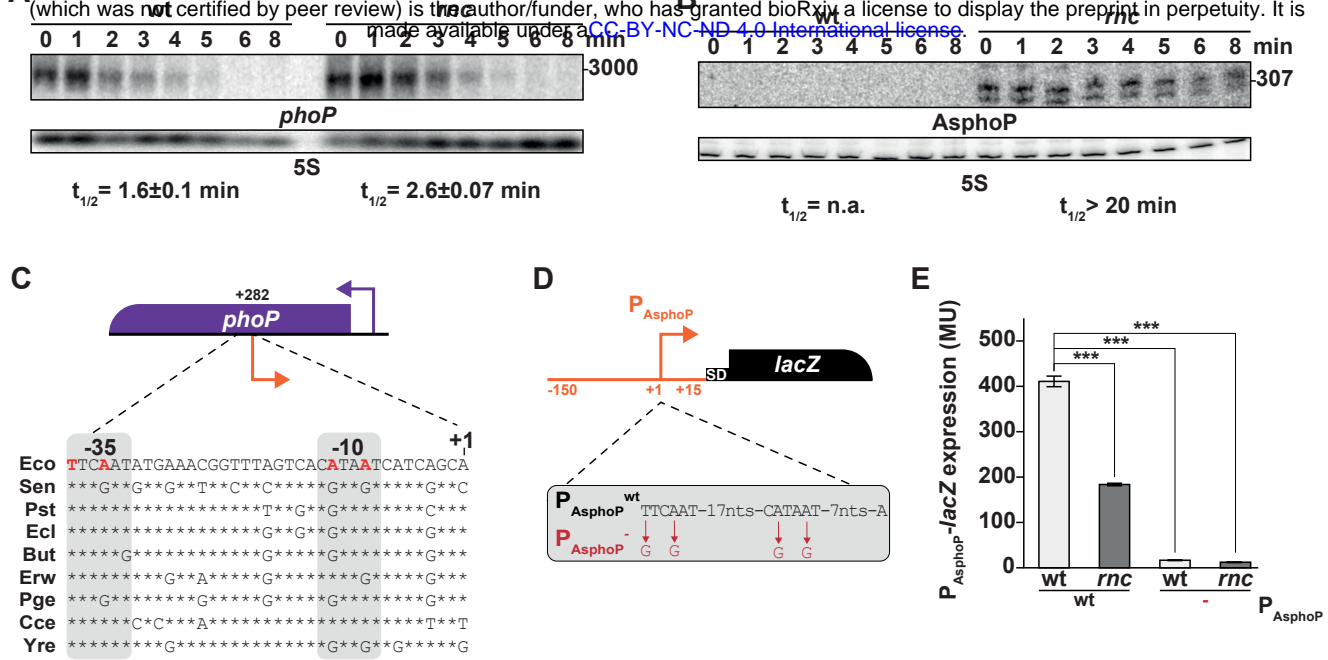

# Figure 3

bioRxiv preprint doi: <https://doi.org/10.1101/2021.05.11.443715>; this version posted May 14, 2021. The copyright holder for this preprint (which was not certified by peer review) is the author/funder, who has granted bioRxiv a license to display the preprint in perpetuity. It is made available under aCC-BY-NC-ND 4.0 International license.

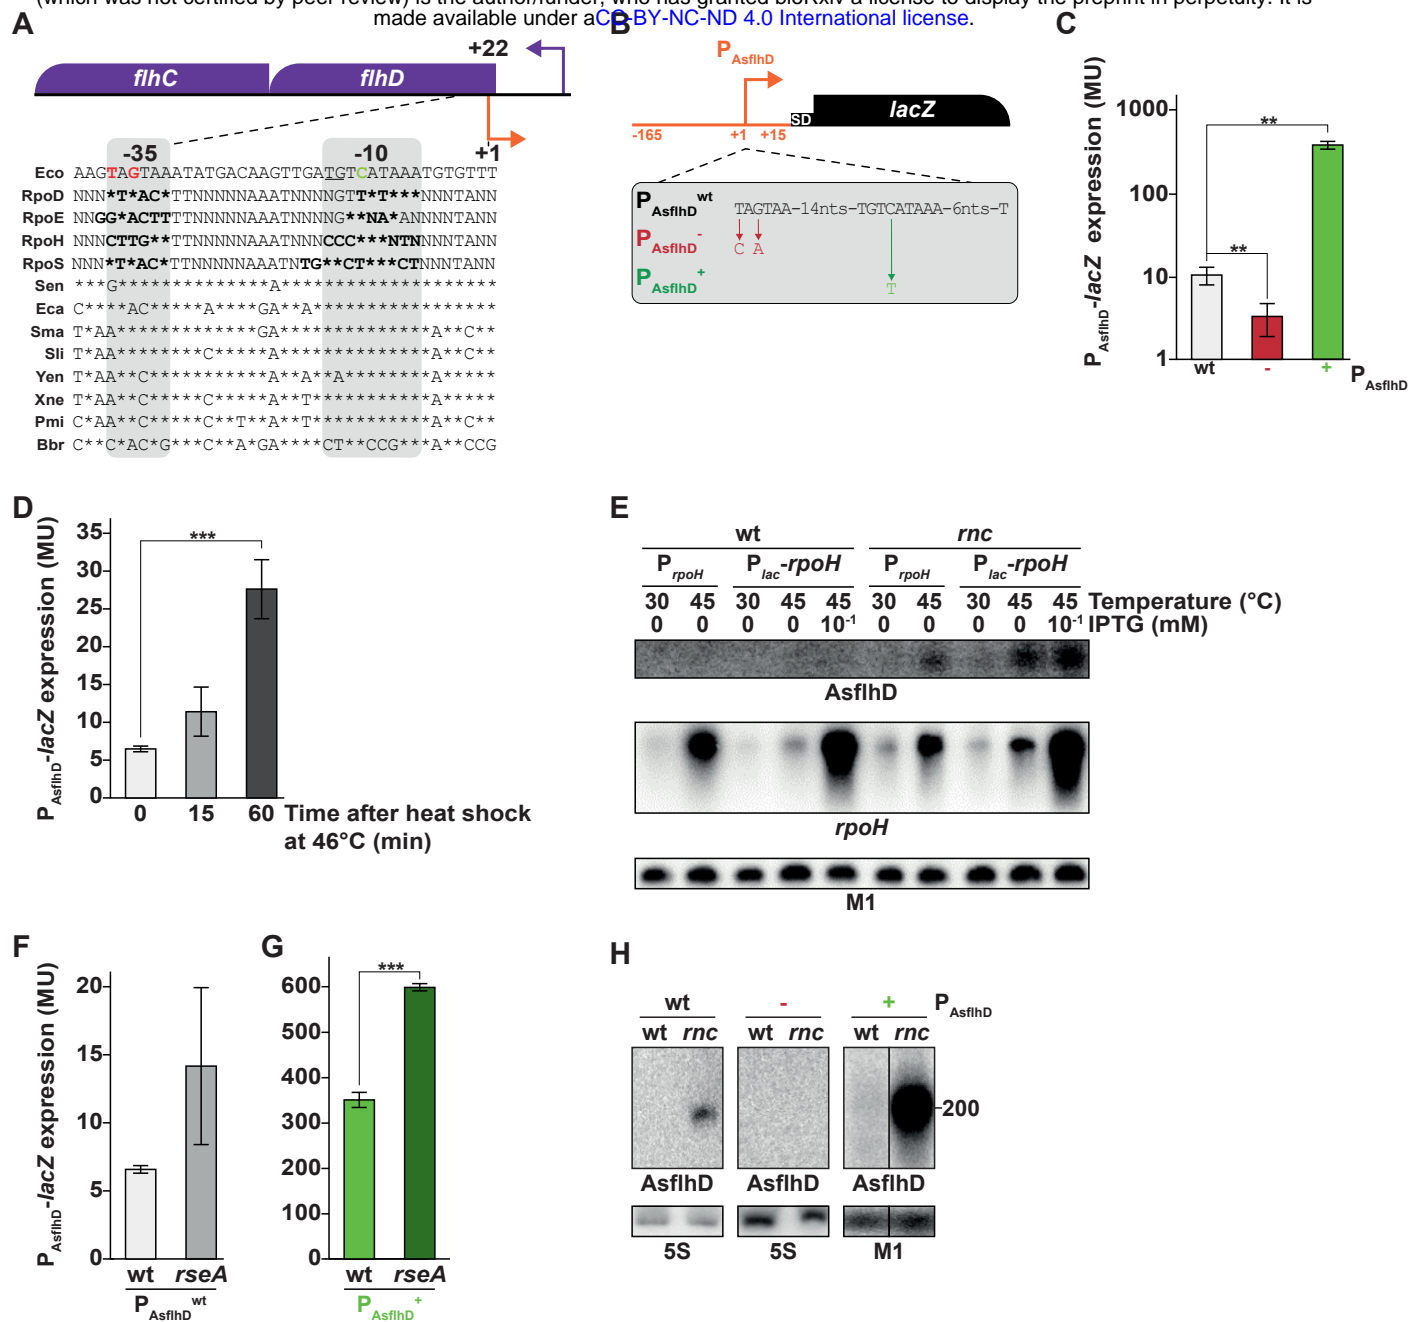



# Figure 4

bioRxiv preprint doi: <https://doi.org/10.1101/2021.05.11.443715>; this version posted May 14, 2021. The copyright holder for this preprint (which was not certified by peer review) is the author/funder, who has granted bioRxiv a license to display the preprint in perpetuity. It is made available under aCC-BY-NC-ND 4.0 International license.

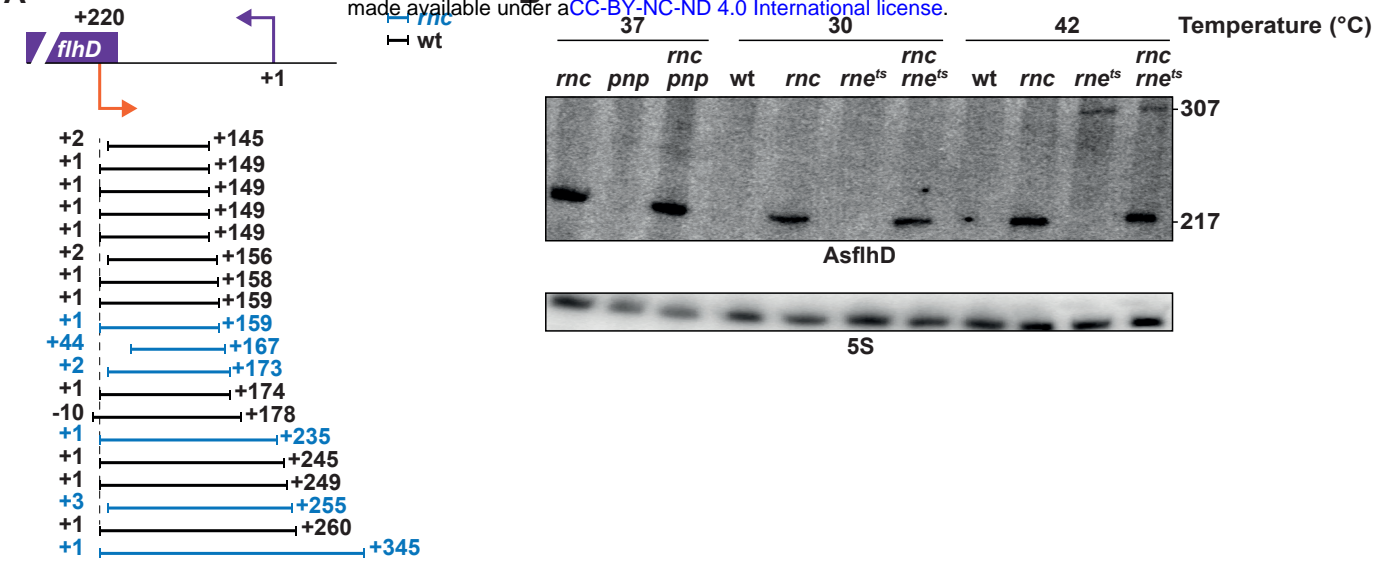

# Figure 5

bioRxiv preprint doi: <https://doi.org/10.1101/2021.05.11.443715>; this version posted May 14, 2021. The copyright holder for this preprint (which was not certified by peer review) is the author/funder, who has granted bioRxiv a license to display the preprint in perpetuity. It is made available under aCC-BY-NC-ND 4.0 International license.

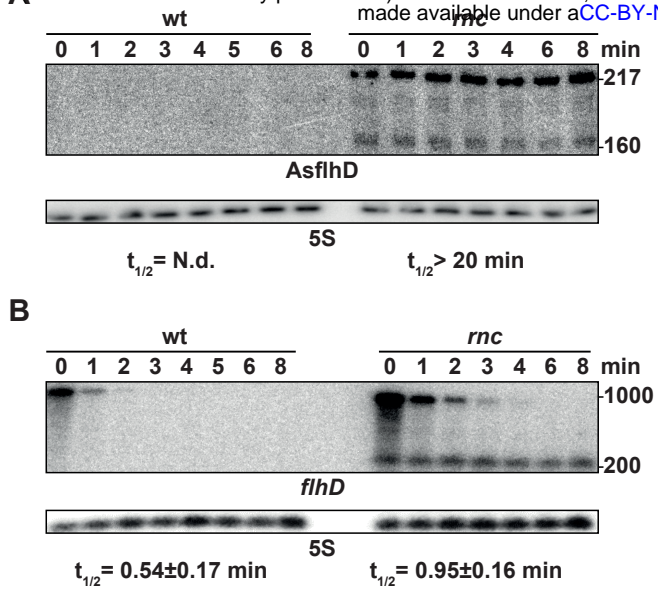

## Figure 6

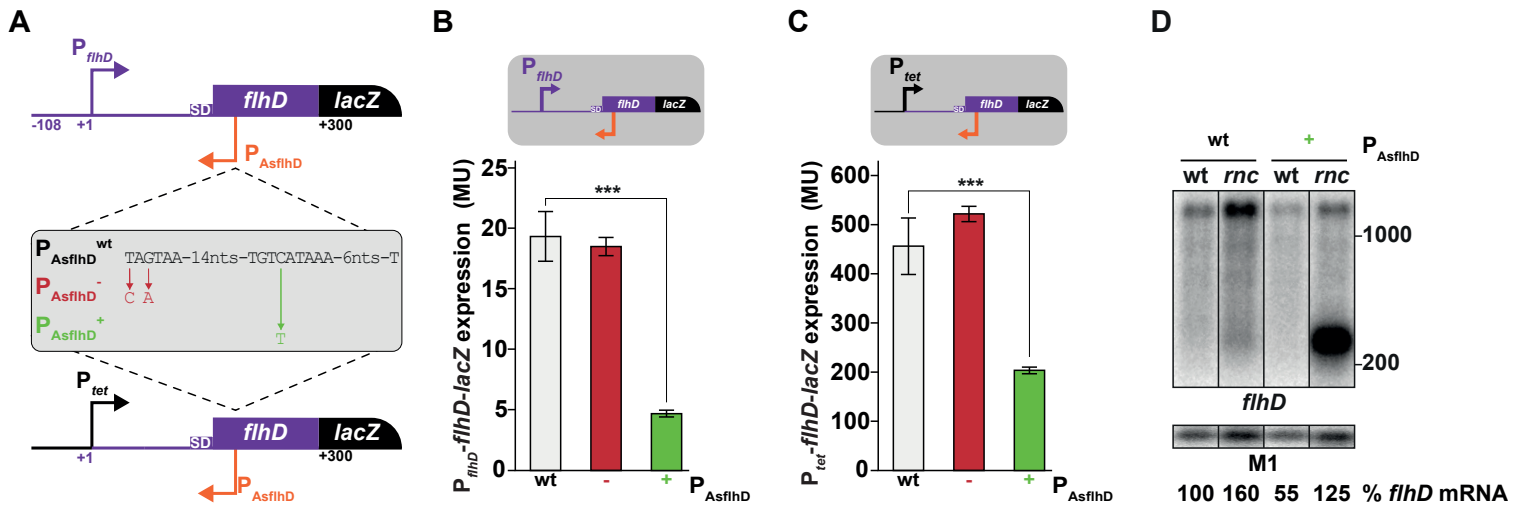

# Figure 7

bioRxiv preprint doi: <https://doi.org/10.1101/2021.05.11.443715>; this version posted May 14, 2021. The copyright holder for this preprint (which was not certified by peer review) is the author/funder, who has granted bioRxiv a license to display the preprint in perpetuity. It is made available under aCC-BY-NC-ND 4.0 International license.

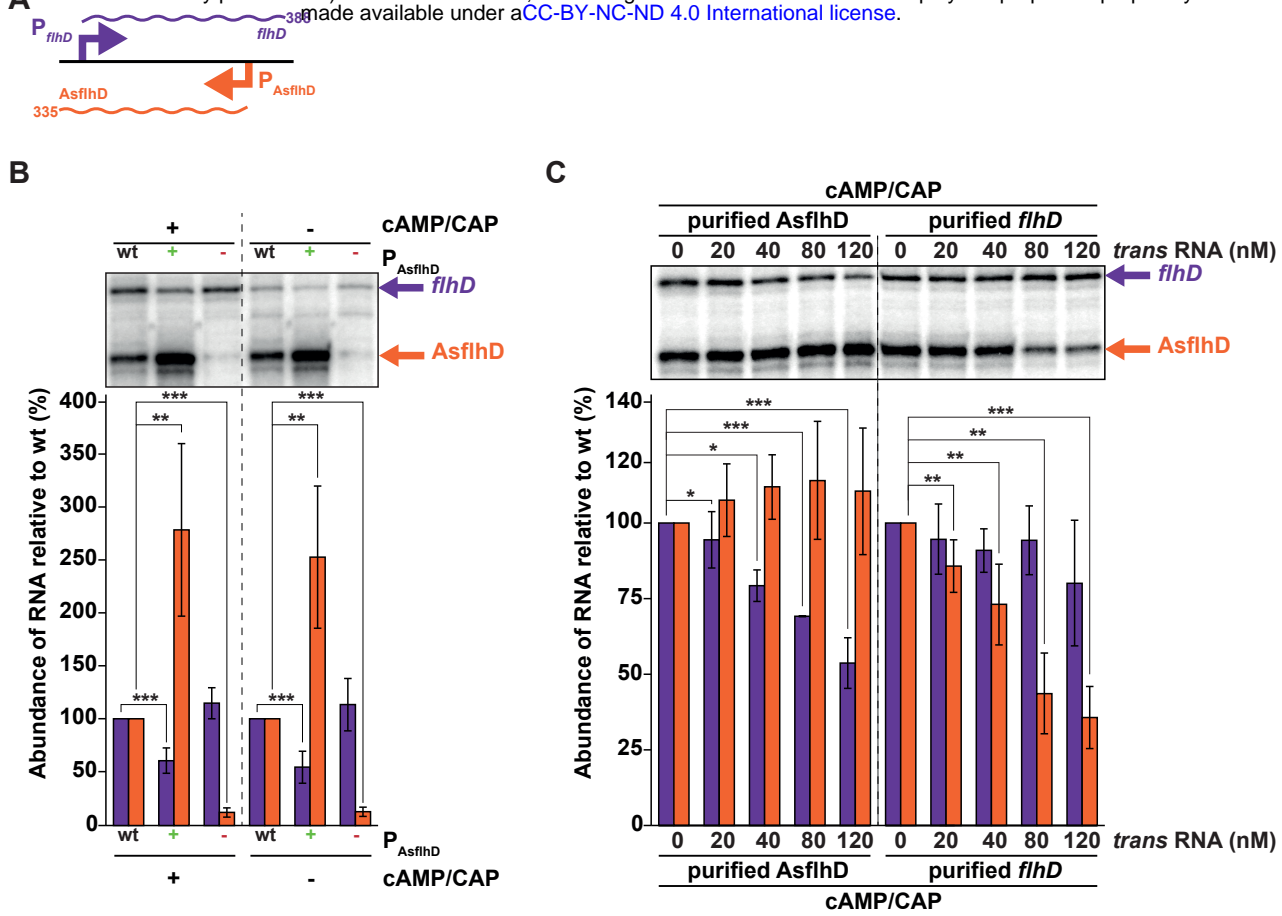

# Figure 8

bioRxiv preprint doi: <https://doi.org/10.1101/2021.05.11.443715>; this version posted May 14, 2021. The copyright holder for this preprint (which was not certified by peer review) is the author/funder, who has granted bioRxiv a license to display the preprint in perpetuity. It is made available under aCC-BY-NC-ND 4.0 International license.

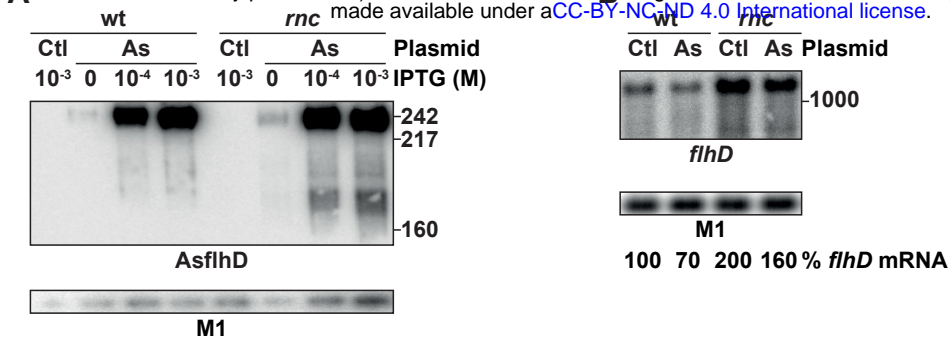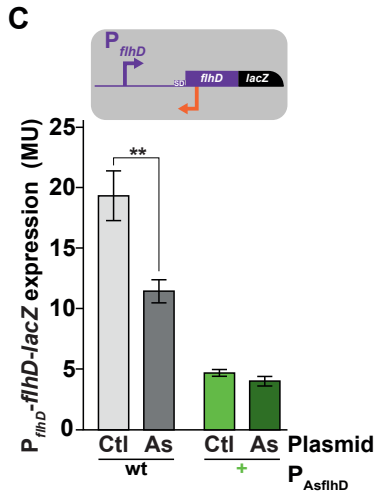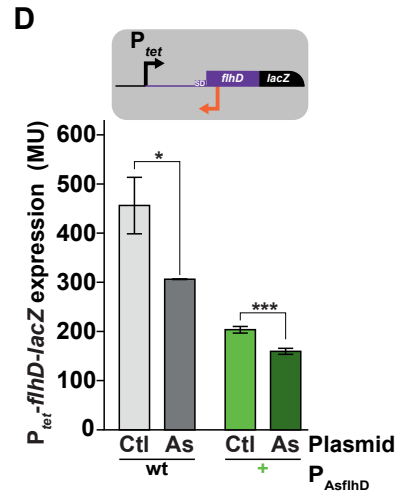

# Figure 9

bioRxiv preprint doi: <https://doi.org/10.1101/2021.05.11.443715>; this version posted May 14, 2021. The copyright holder for this preprint (which was not certified by peer review) is the author/funder, who has granted bioRxiv a license to display the preprint in perpetuity. It is made available under aCC-BY-NC-ND 4.0 International license.

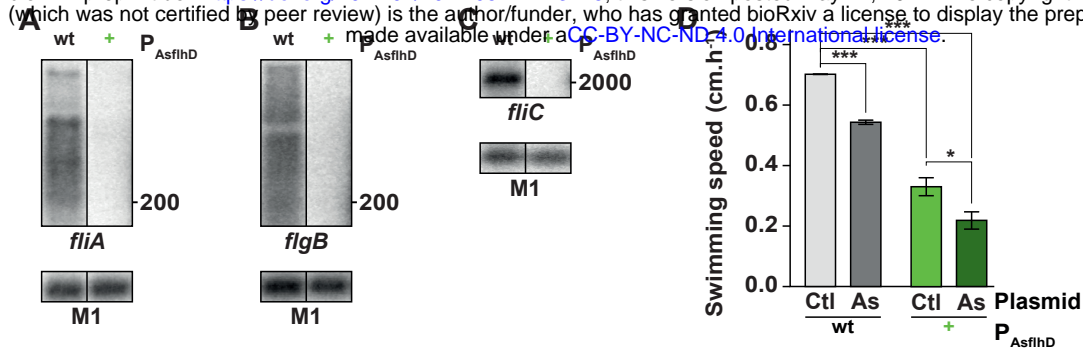

## Figure 10

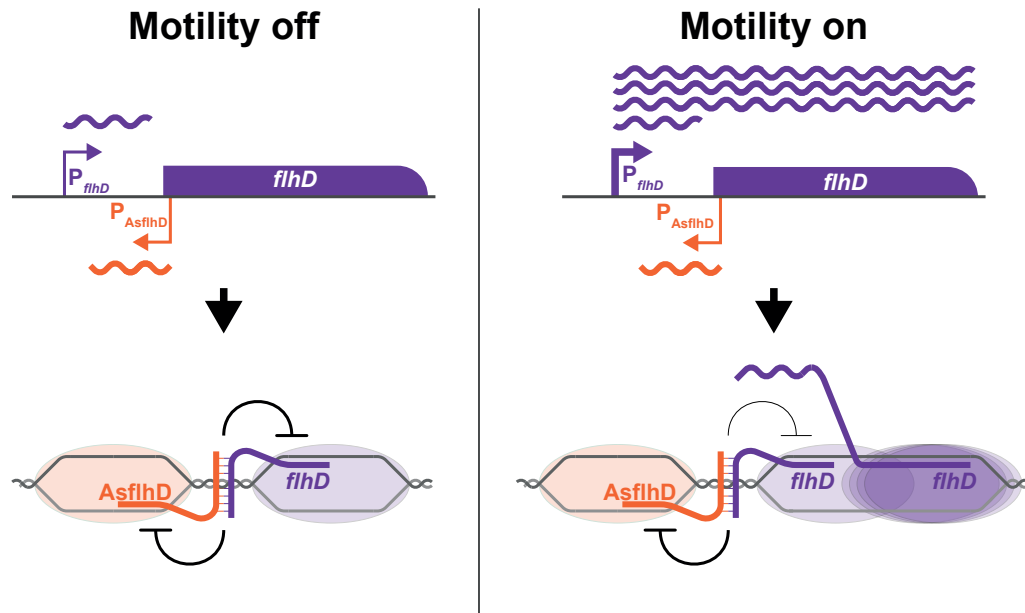

Source: https://www.biorxiv.org/content/biorxiv/early/2021/05/14/2021.05.11.443715.full.pdf
